# Supplementary material for: Synthetic Derivatives of Natural ent-Kaurane Atractyligenin Disclose Anticancer Properties in Colon Cancer Cells, Triggering Apoptotic Cell Demise
Source: MDPI journal article supplement (doi:10.3390/ijms25073925), 2024-03-31
Supplement: s1 [file s1]

## Supplementary Materials

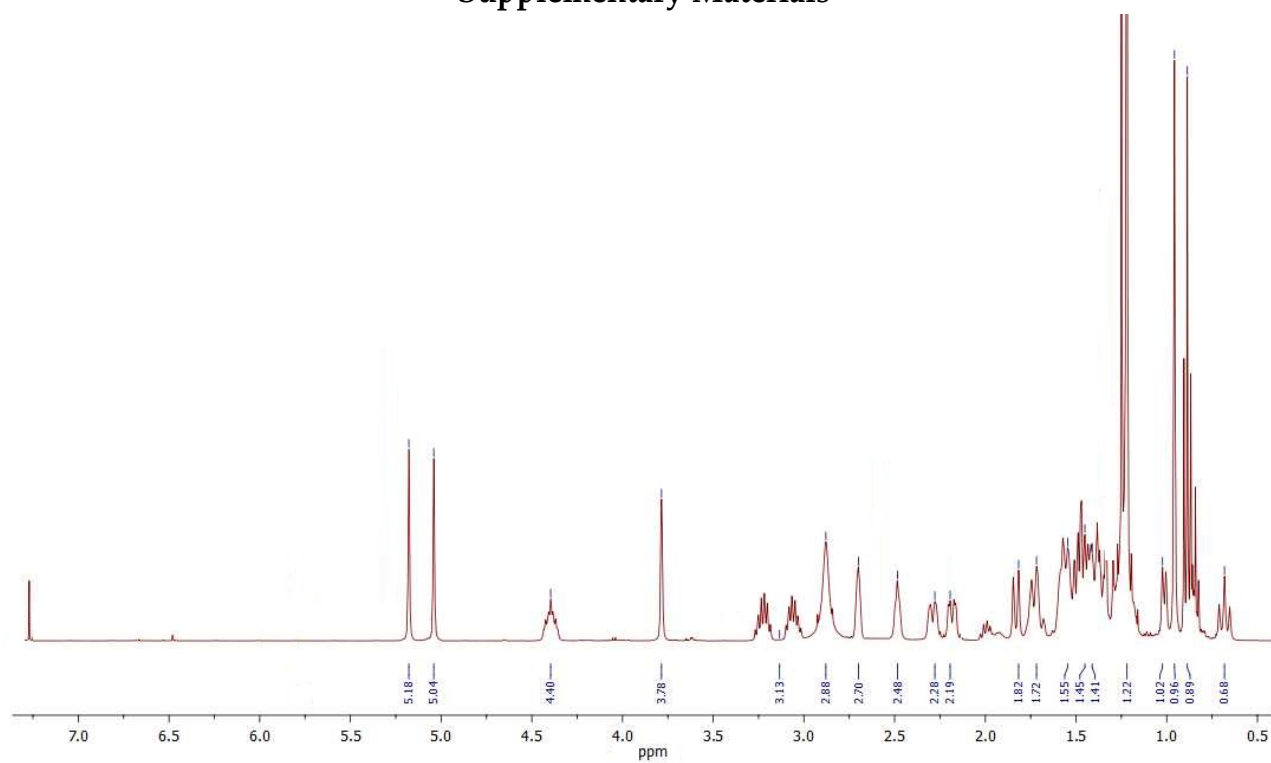

**Figure S1.** <sup>1</sup>H-NMR spectrum of compound 5.

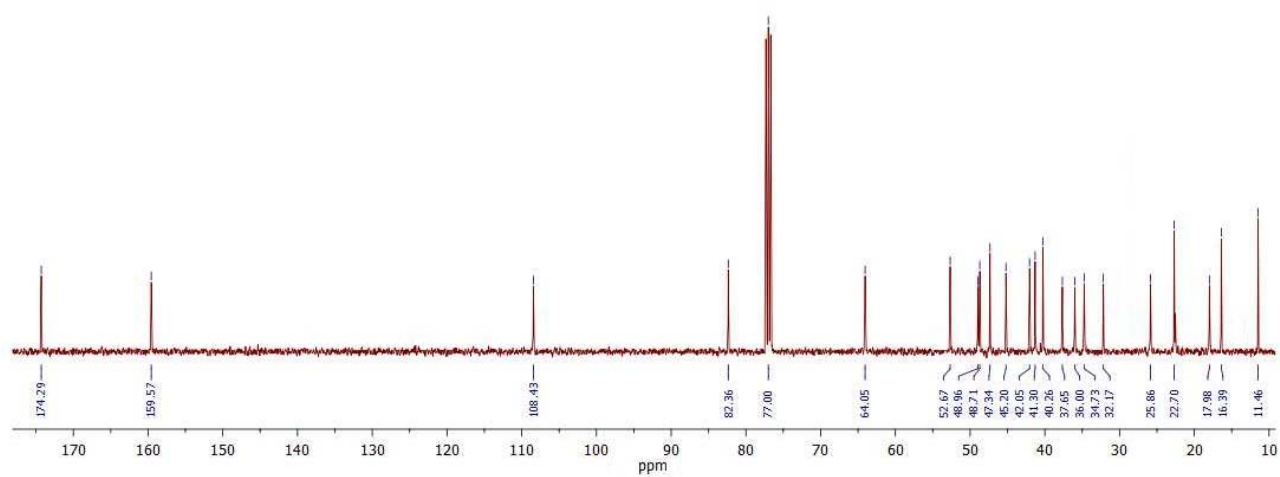

**Figure S2.** <sup>13</sup>C-NMR spectrum of compound 5.

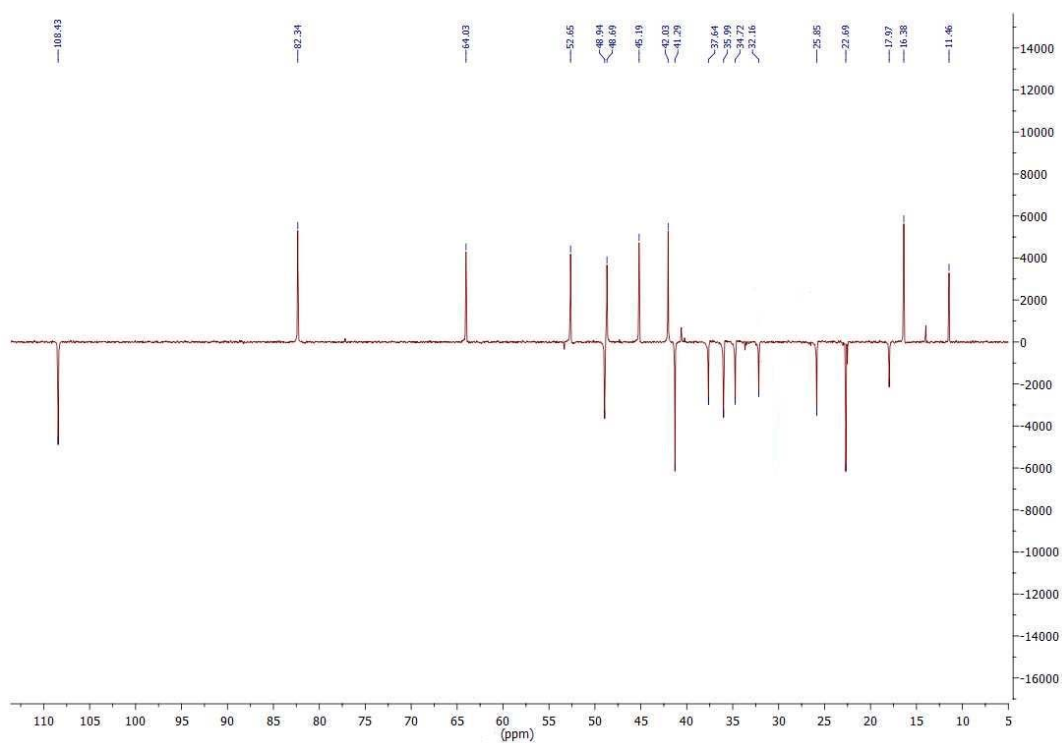

Figure S3. DEPT spectrum of compound 5.

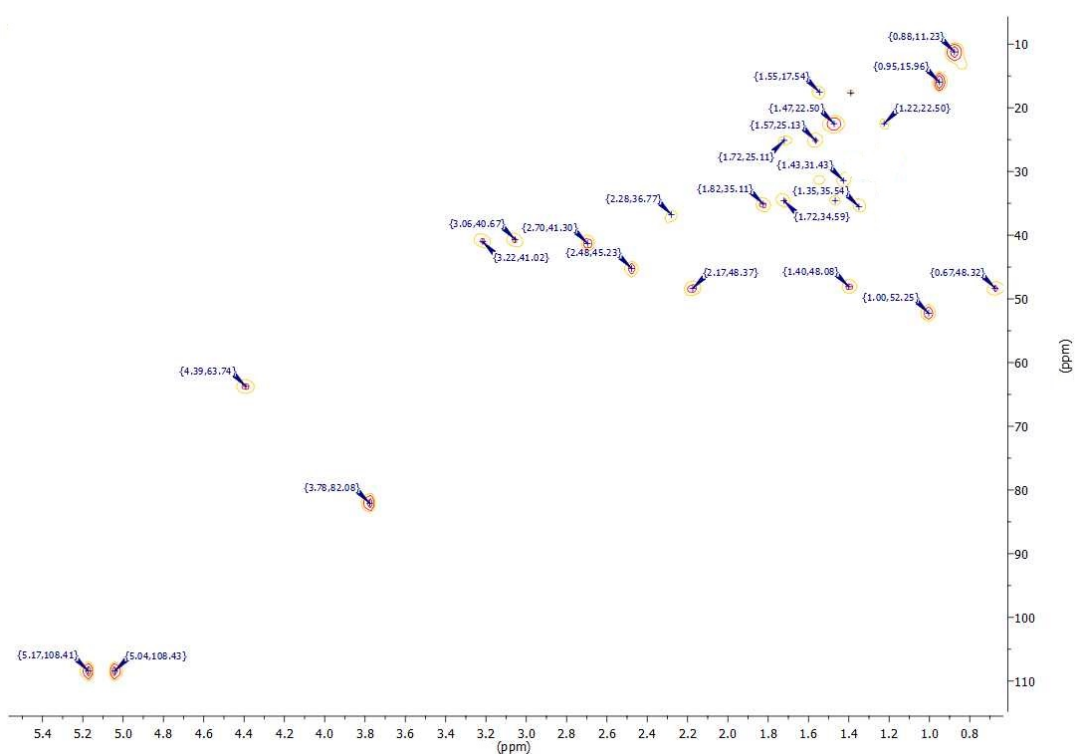

Figure S4. HSQC spectrum of compound 5.

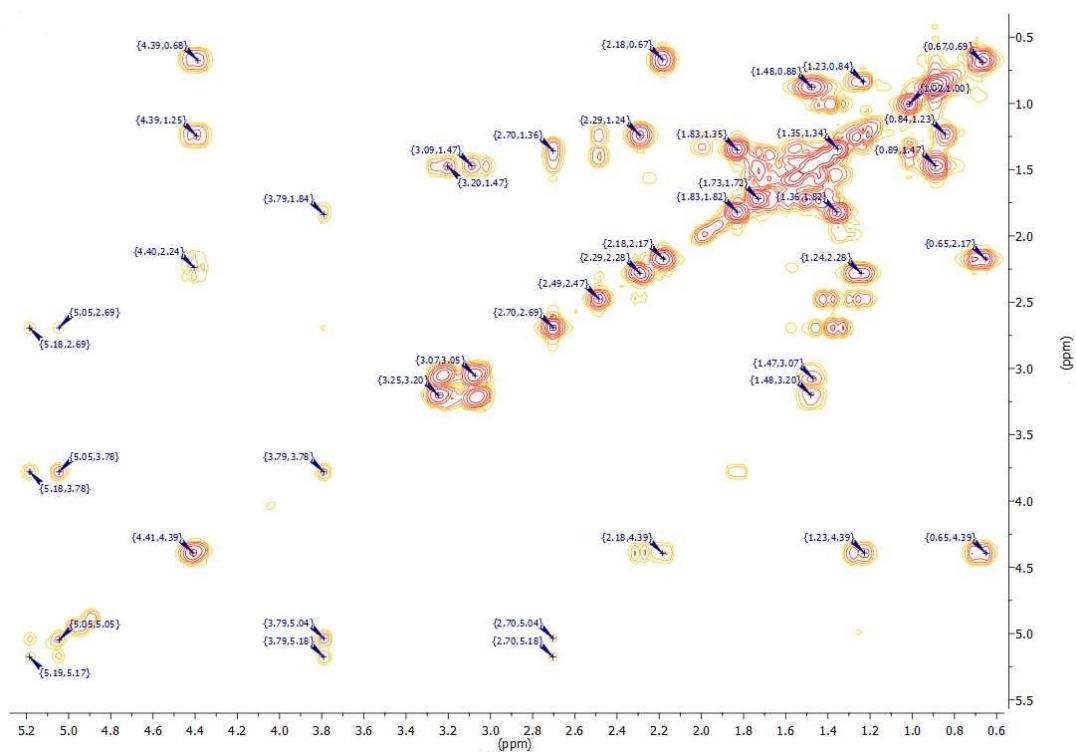

Figure S5. COSY spectrum of compound 5.

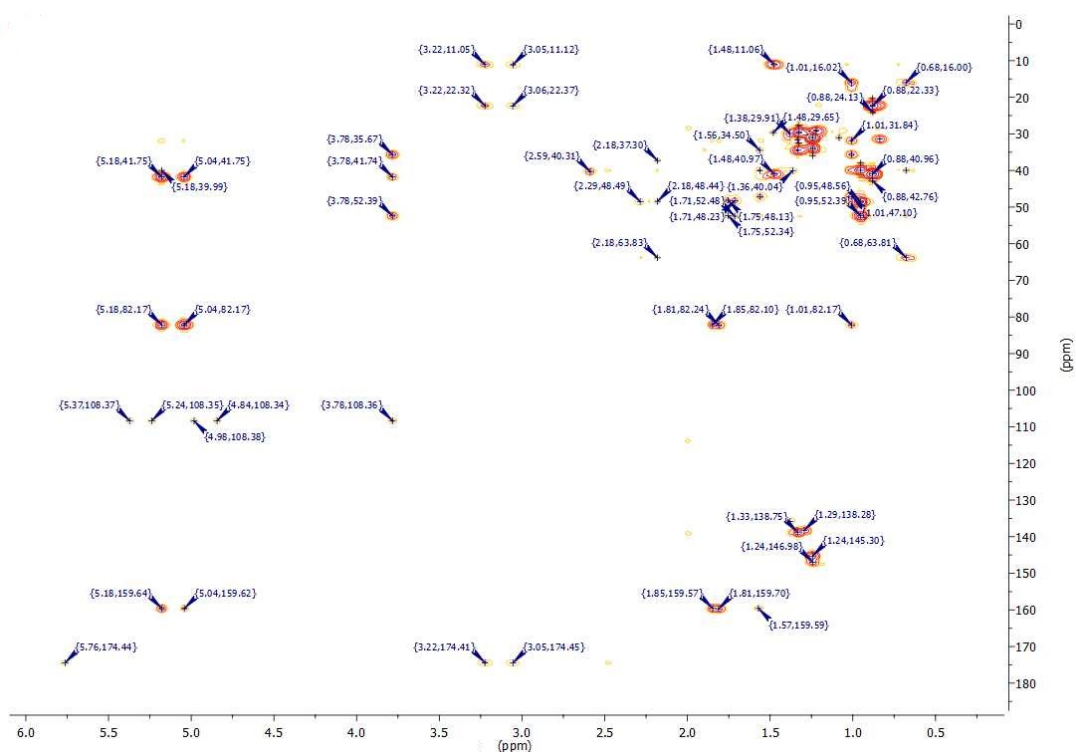

Figure S6. HMBC spectrum of compound 5.

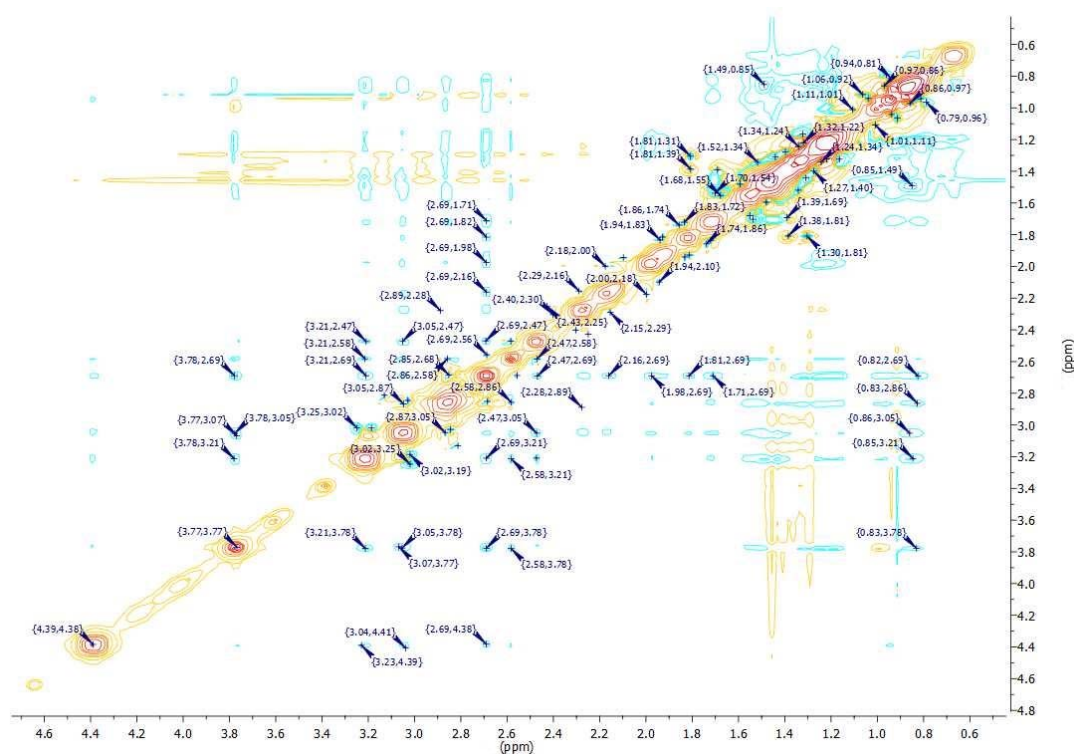

**Figure S7.** NOESY spectrum of compound 5.

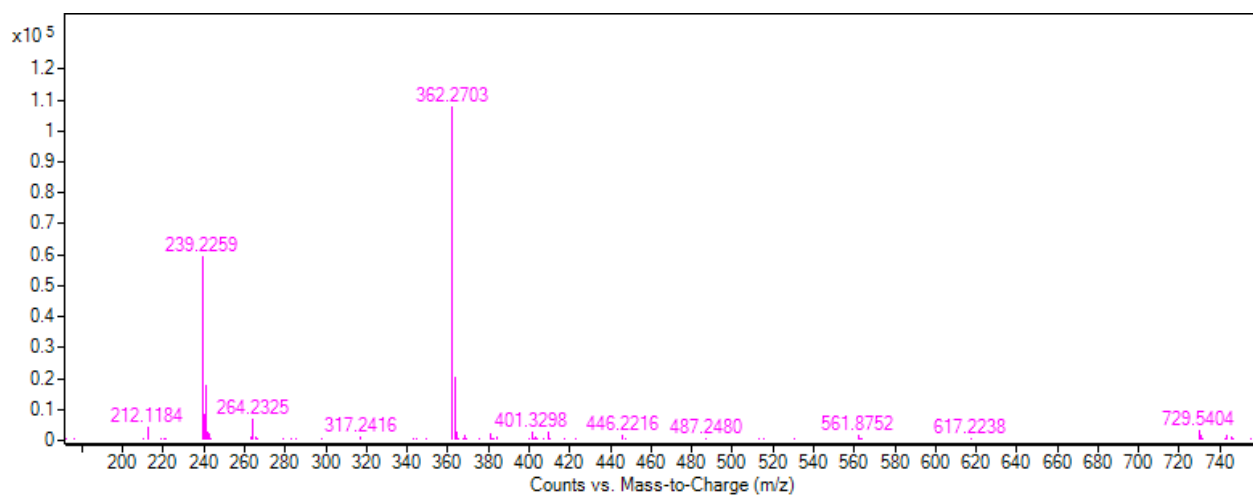

**Figure S8.** Mass spectrum of compound 5.

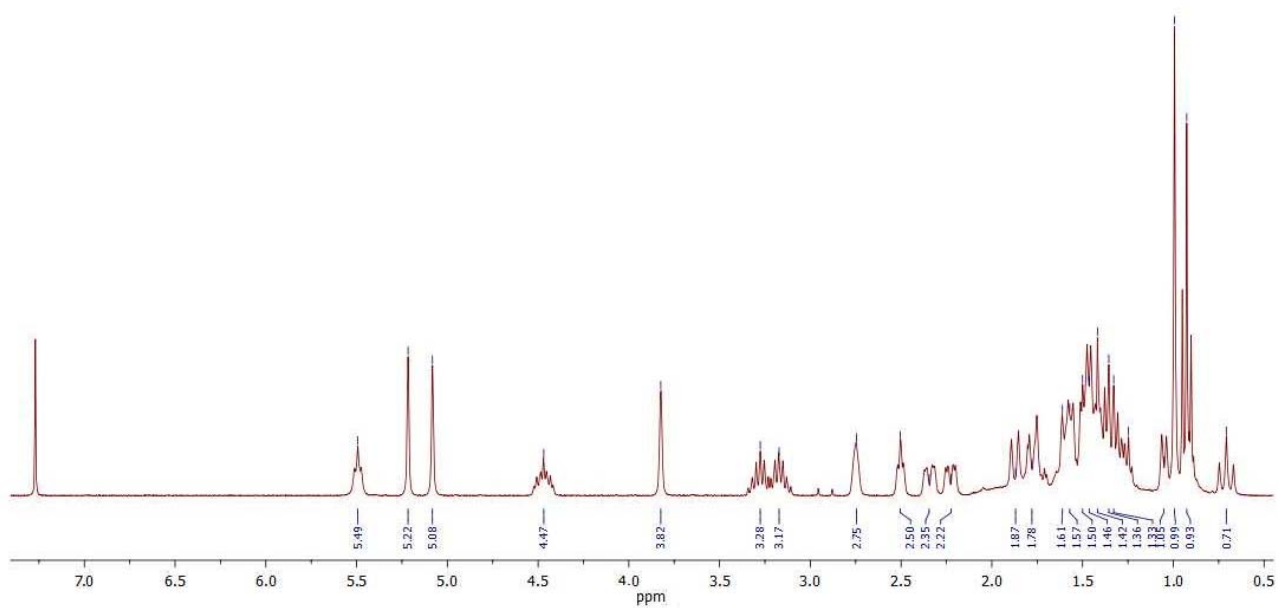

**Figure S9.**  $^1\text{H}$ -NMR spectrum of compound **6**.

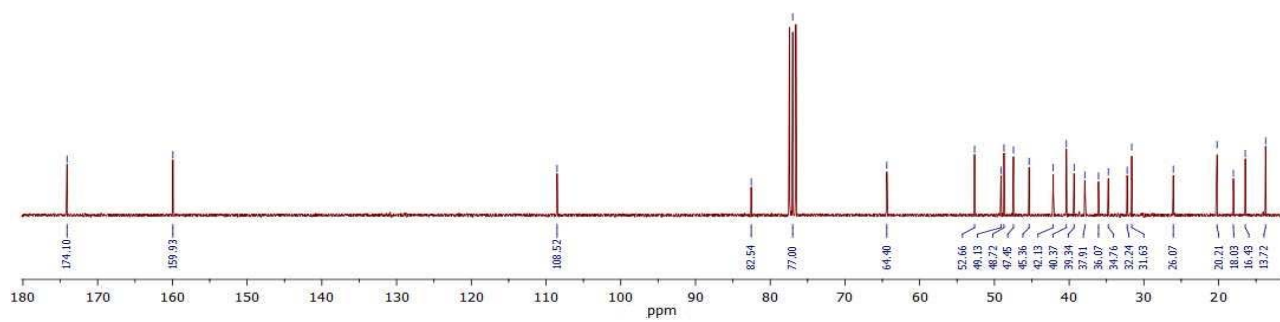

**Figure S10.**  $^{13}\text{C}$ -NMR spectrum of compound **6**.

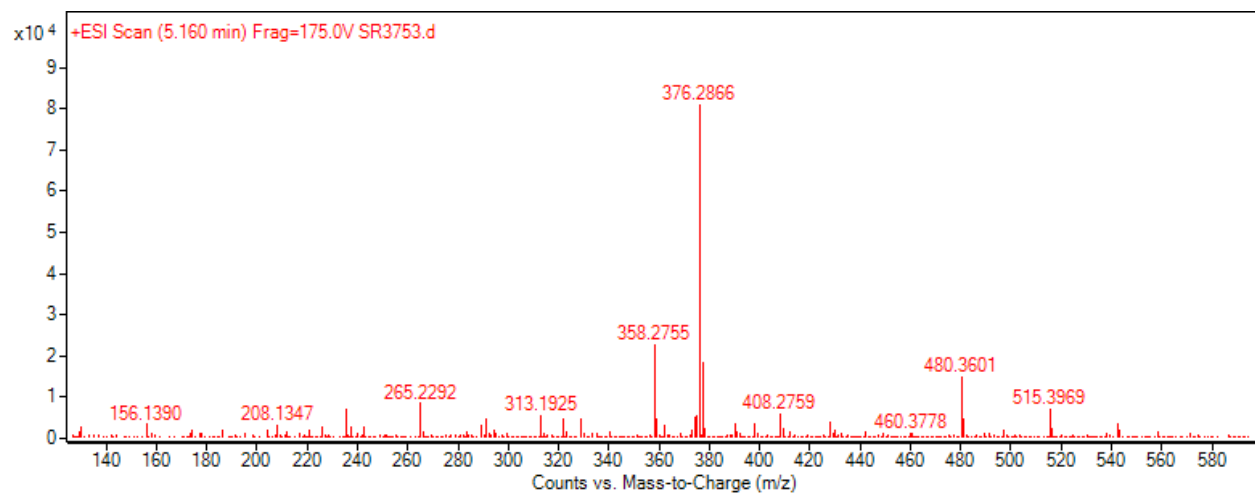

Figure S11. Mass spectrum of compound 6.

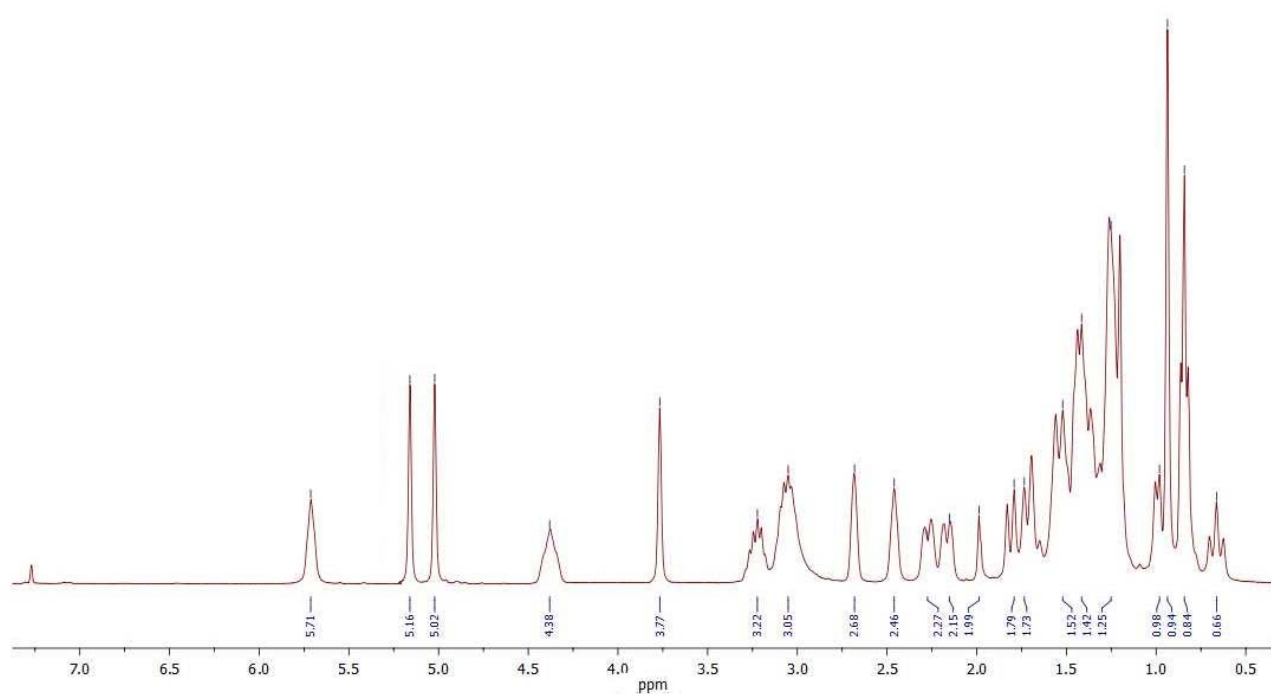

Figure S12.  $^1\text{H}$ -NMR spectrum of compound 7.

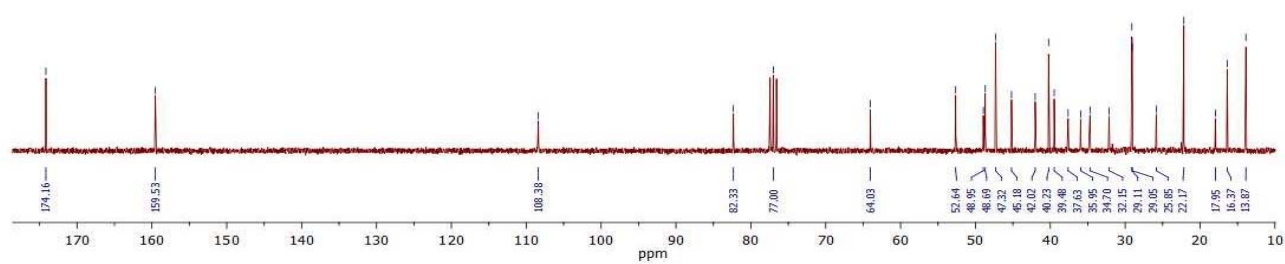

**Figure S13.** <sup>13</sup>C-NMR spectrum of compound 7.

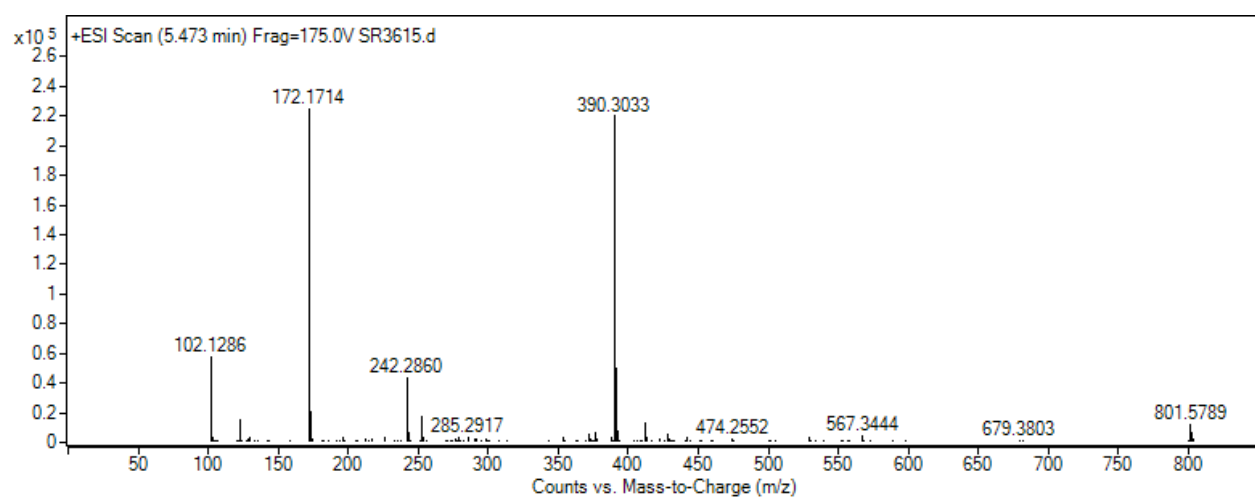

**Figure S14.** Mass spectrum of compound 7.

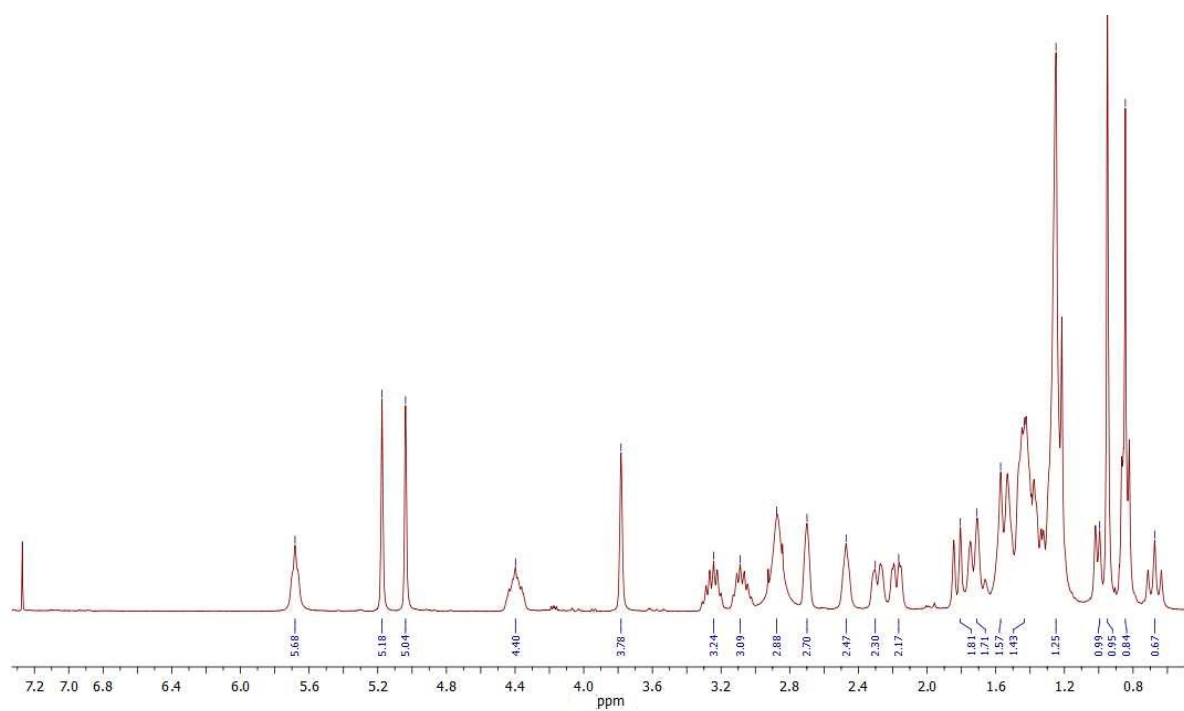

**Figure S15.**  $^1\text{H}$ -NMR spectrum of compound **8**.

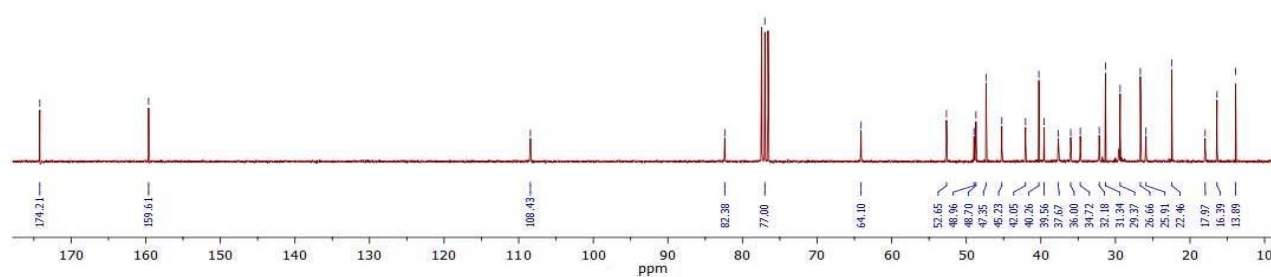

**Figure S16.**  $^{13}\text{C}$ -NMR spectrum of compound **8**.



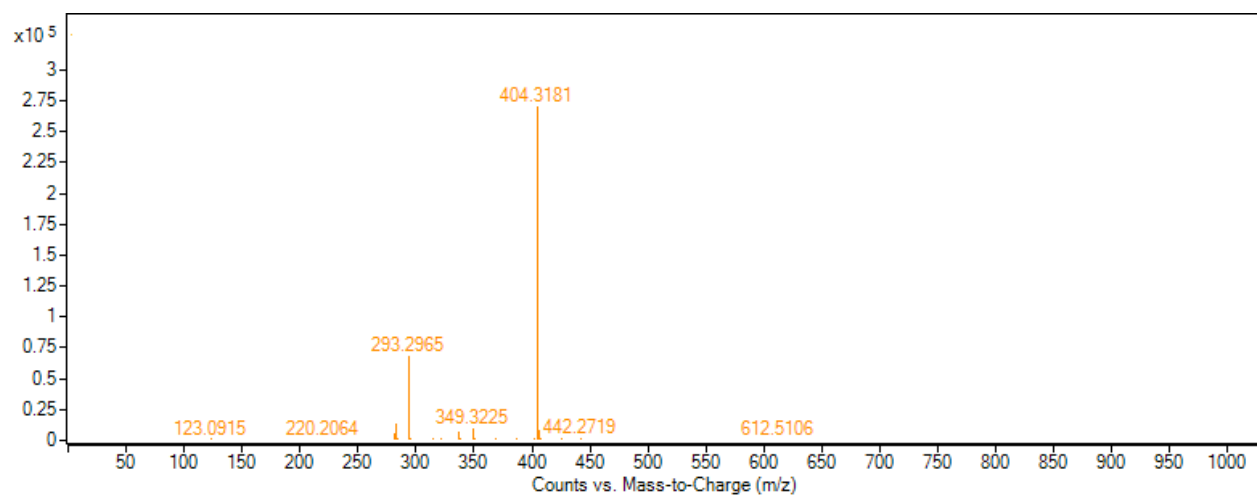

**Figure S17.** Mass spectrum of compound 8.

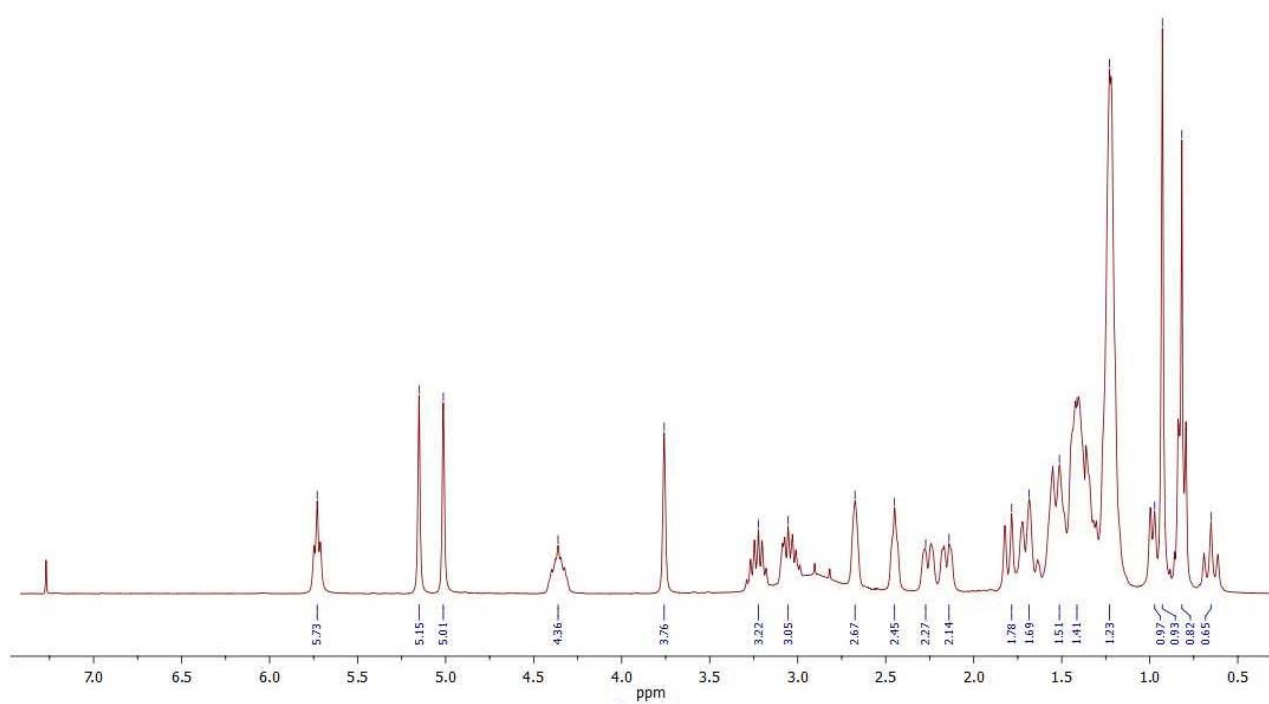

**Figure S18.**  $^1\text{H}$ -NMR spectrum of compound 9.

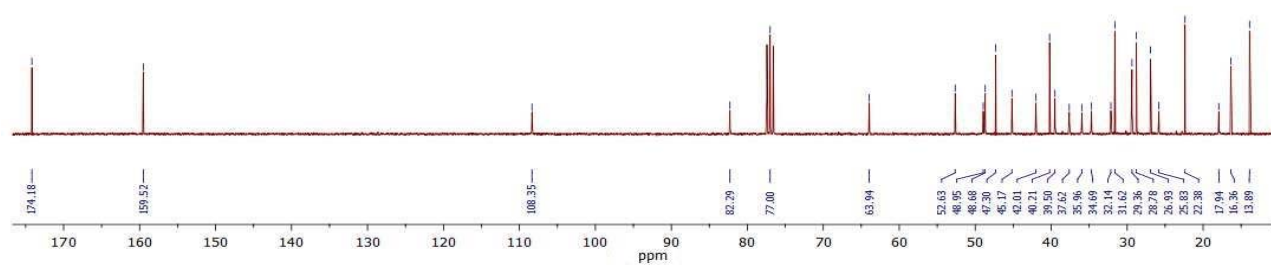

**Figure S19.** <sup>13</sup>C-NMR spectrum of compound 9.

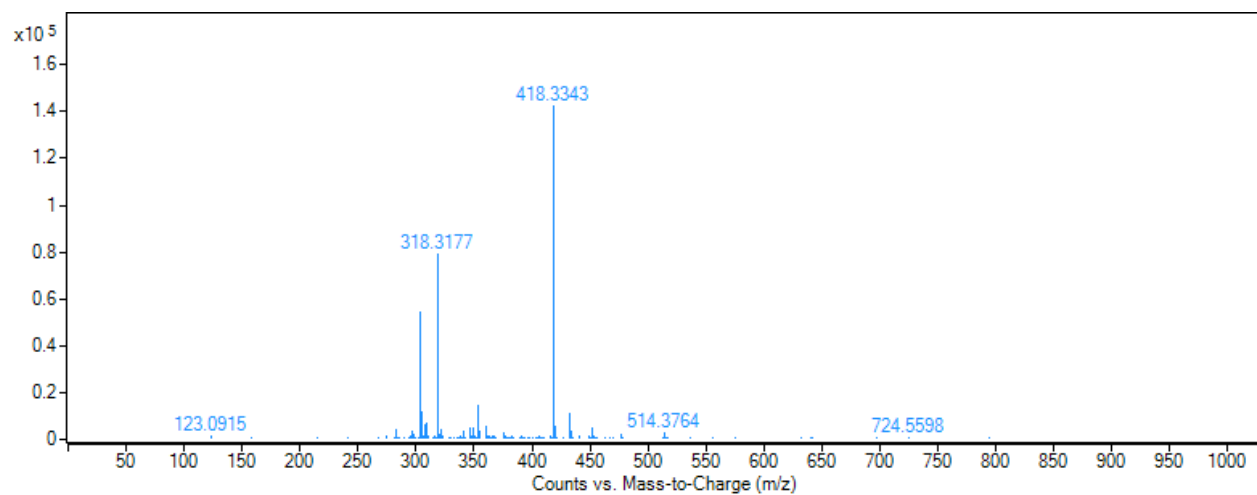

**Figure S20.** Mass spectrum of compound 9.

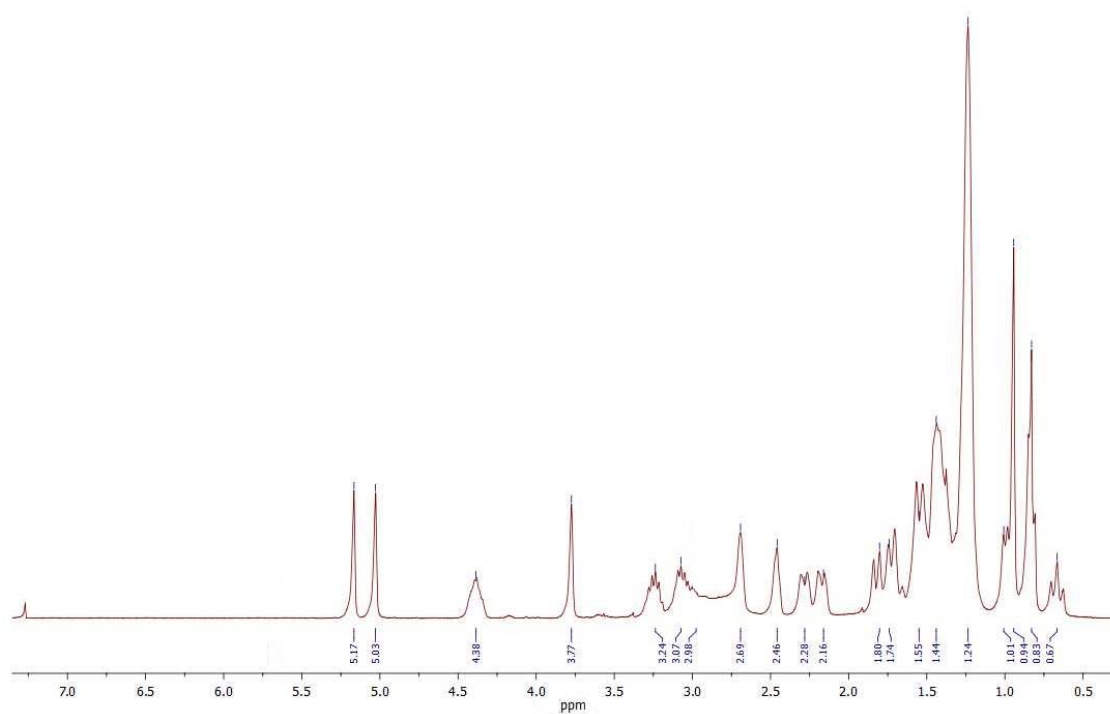

**Figure S21.** <sup>1</sup>H-NMR spectrum of compound 10.

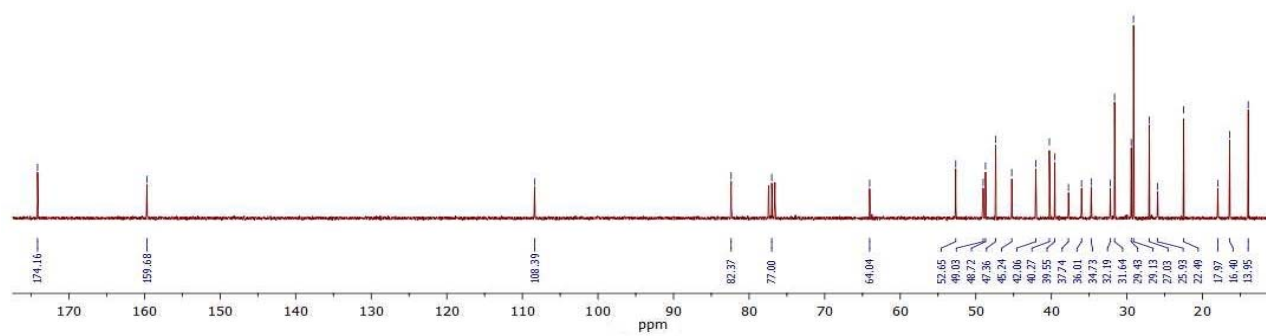

**Figure S22.** <sup>13</sup>C-NMR spectrum of compound 10.

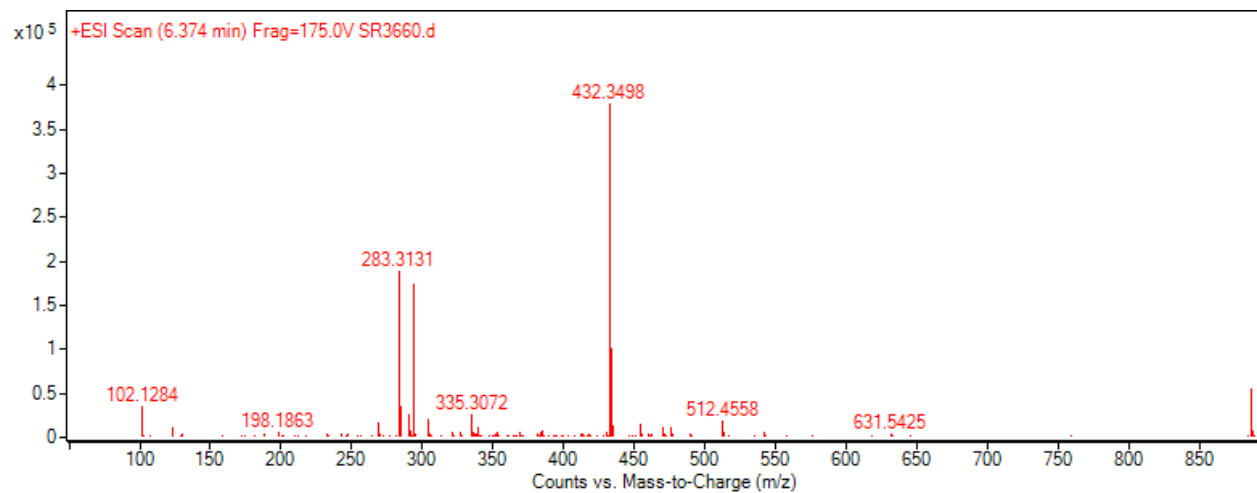

Figure S23. Mass spectrum of compound 10.

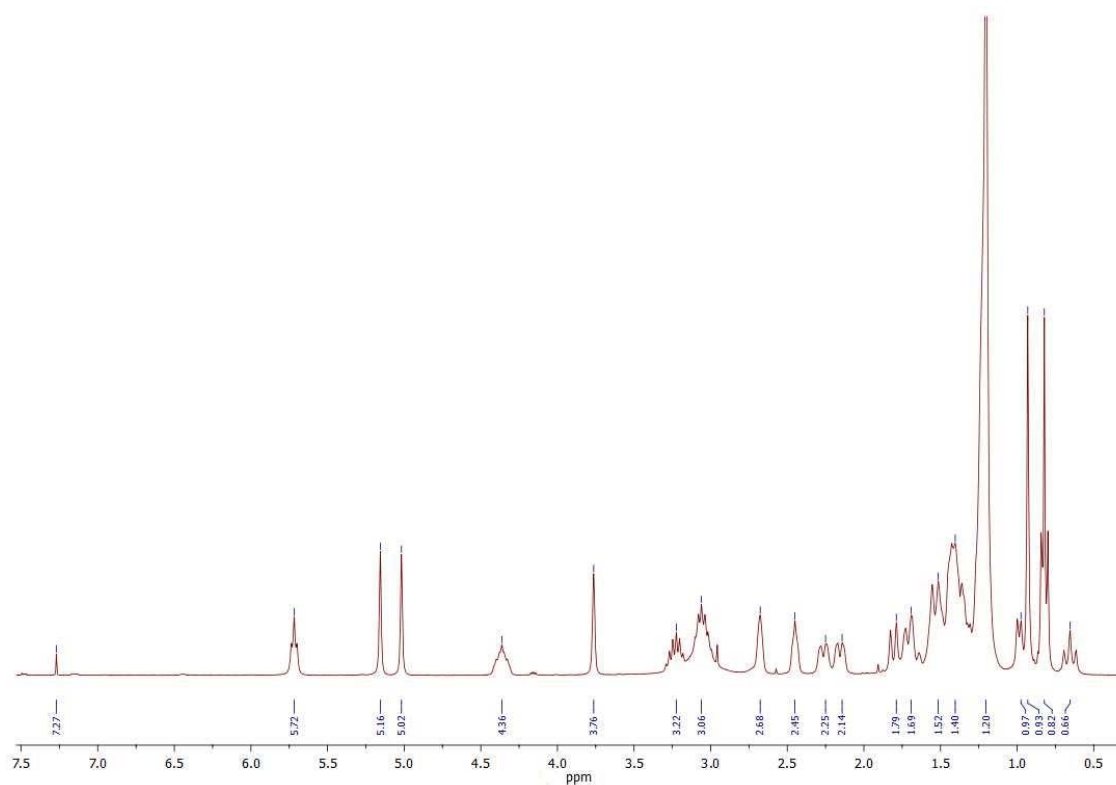

Figure S24. <sup>1</sup>H-NMR spectrum of compound 11.

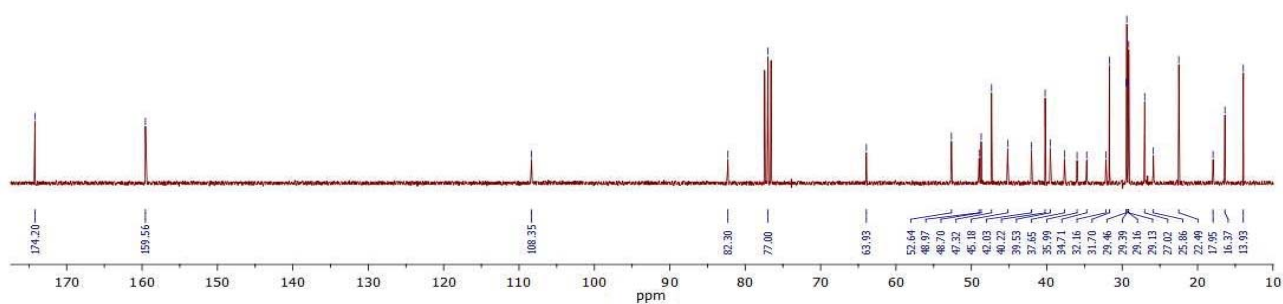

**Figure S25.**  $^{13}\text{C}$ -NMR spectrum of compound **11**.

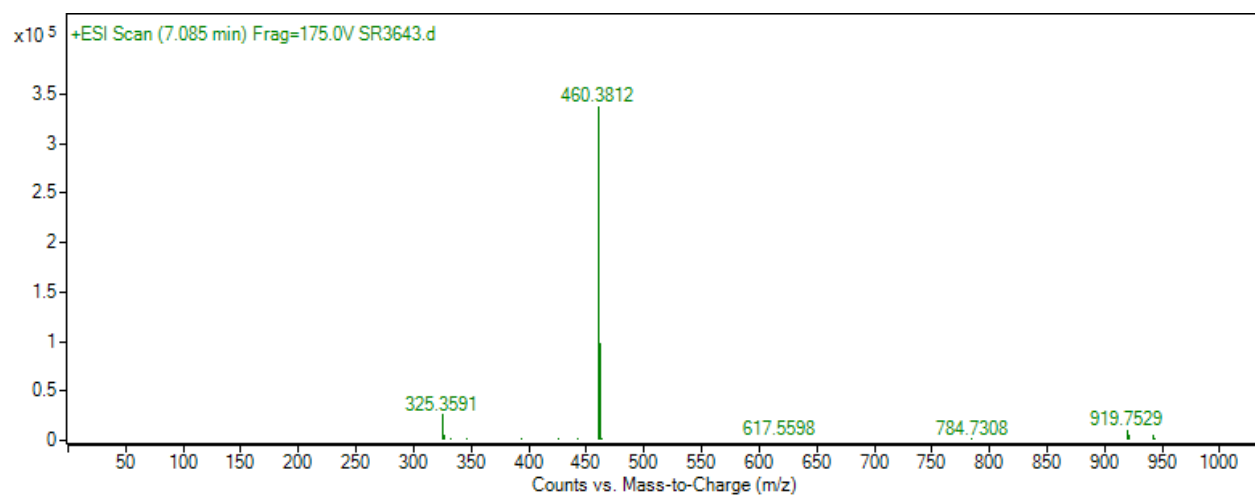

**Figure S26.** Mass spectrum of compound **11**.

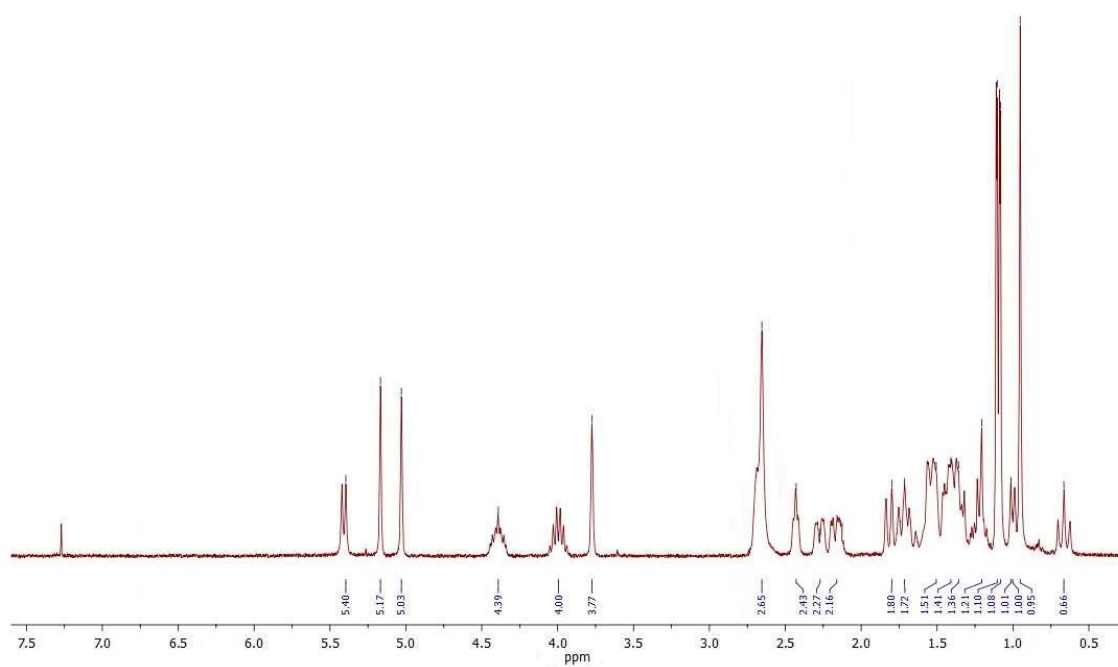

**Figure S27.** <sup>1</sup>H-NMR spectrum of compound 12.

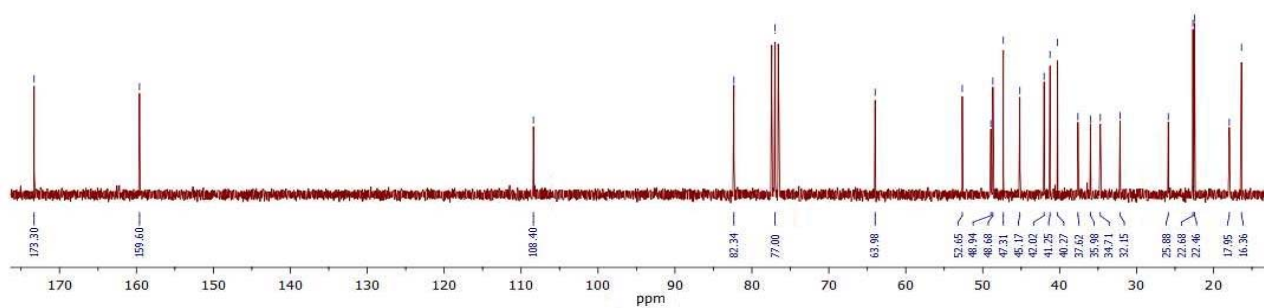

**Figure S28.** <sup>13</sup>C-NMR spectrum of compound 12.

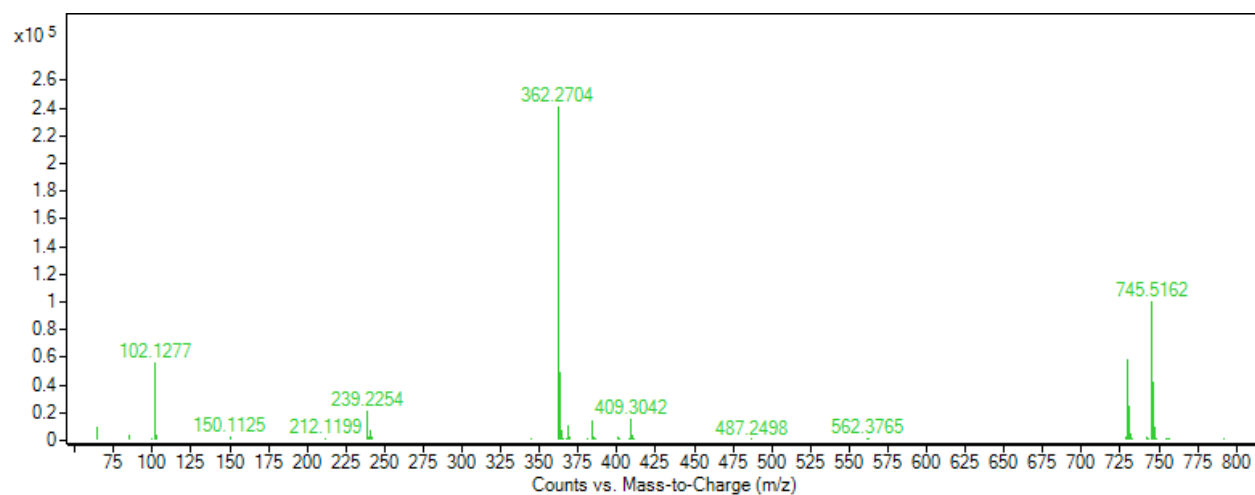

**Figure S29.** Mass spectrum of compound 12.

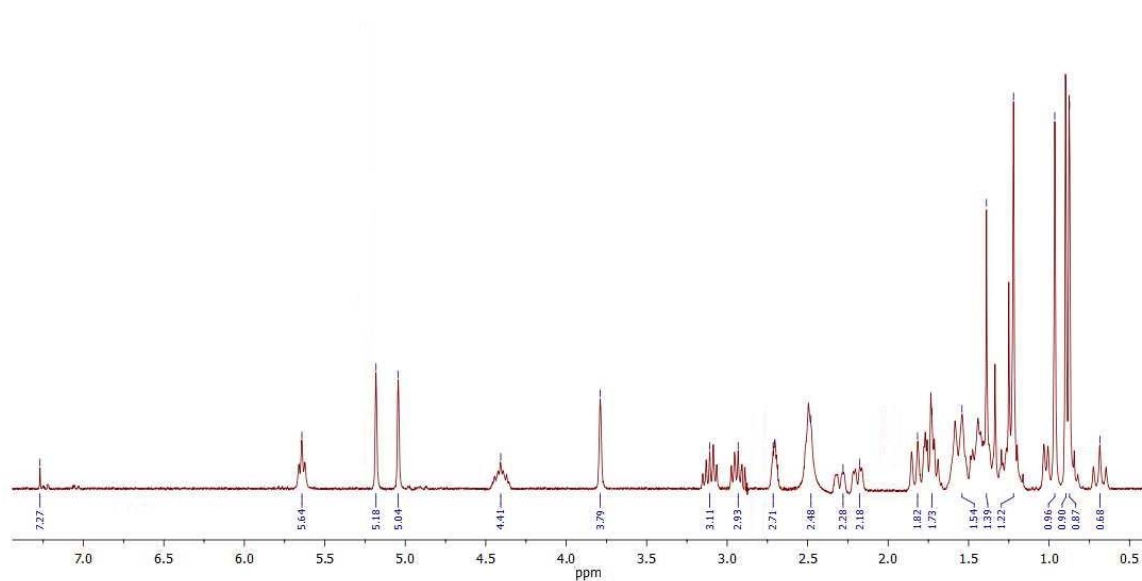

**Figure S30.**  $^1\text{H}$ -NMR spectrum of compound 13.

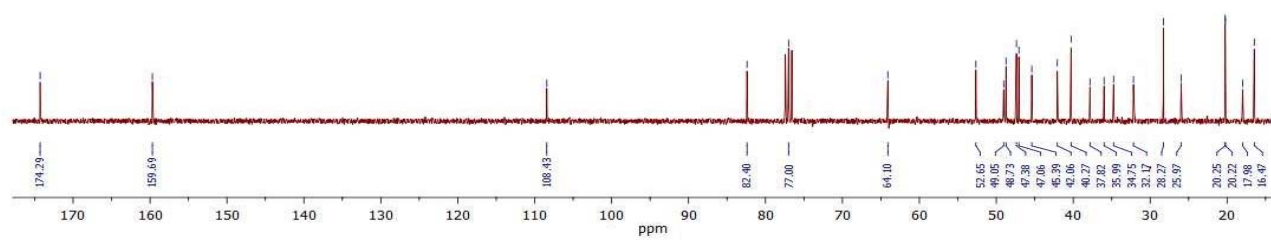

**Figure S31.** <sup>13</sup>C-NMR spectrum of compound 13.

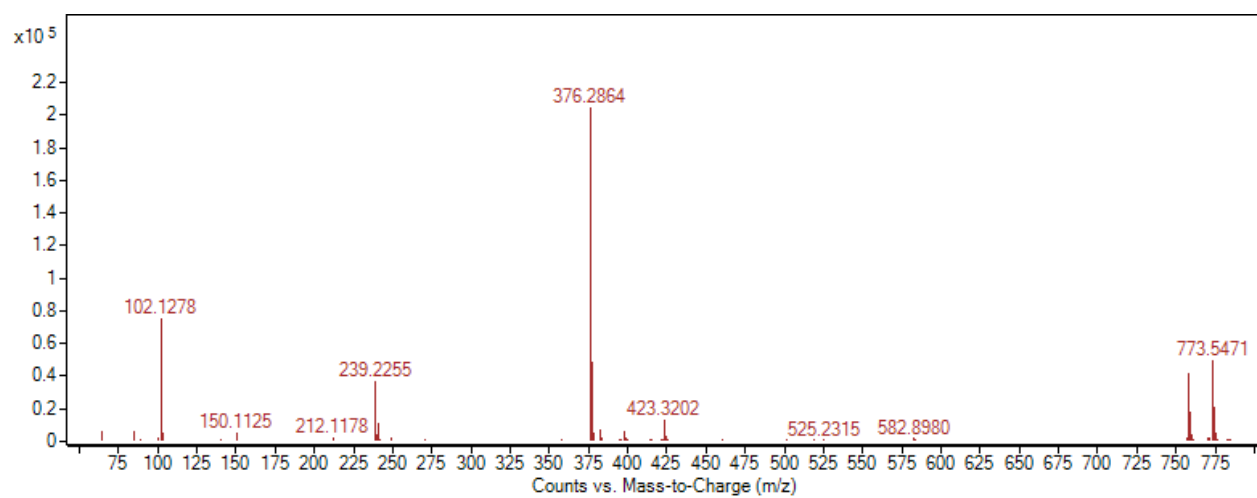

**Figure S32.** Mass spectrum of compound 13.



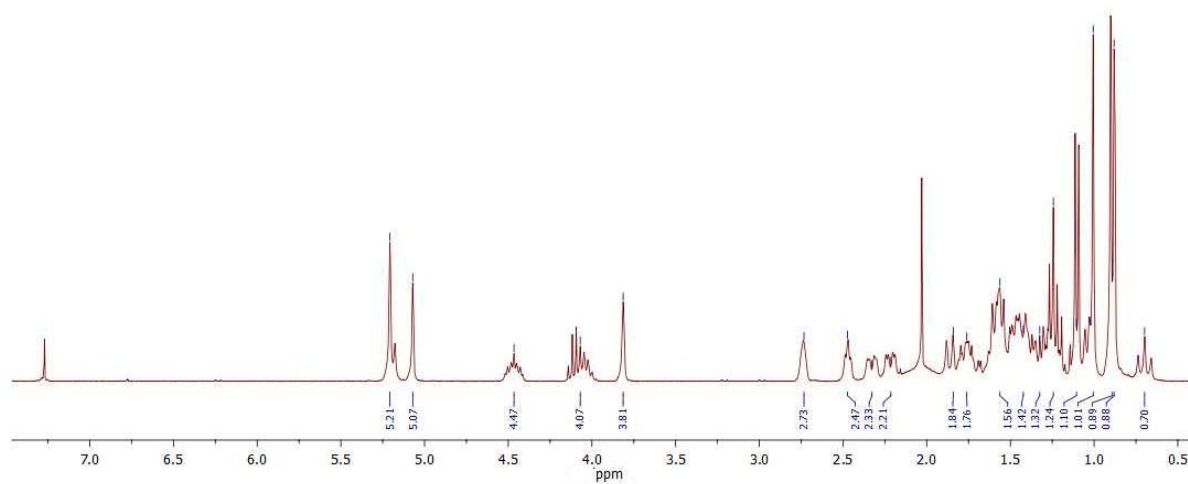

**Figure S33.**  $^1\text{H}$ -NMR spectrum of compound **14**.

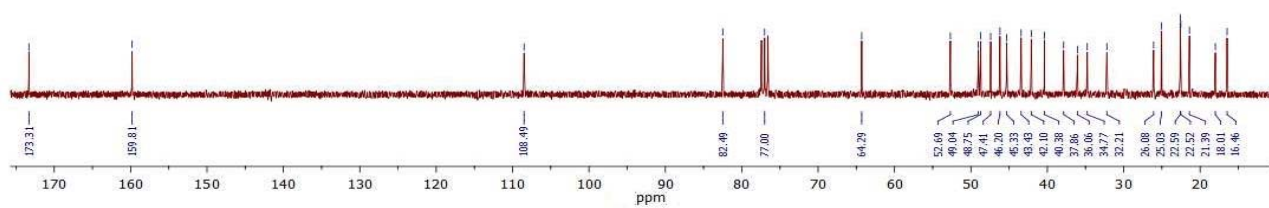

**Figure S34.**  $^{13}\text{C}$ -NMR spectrum of compound **14**.

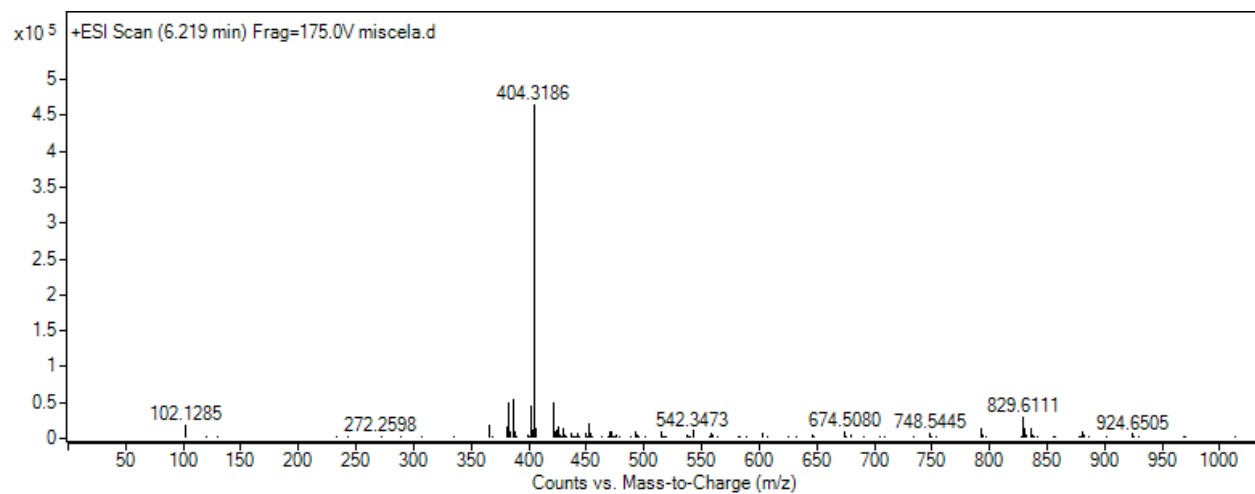

Figure S35. Mass spectrum of compound 14.

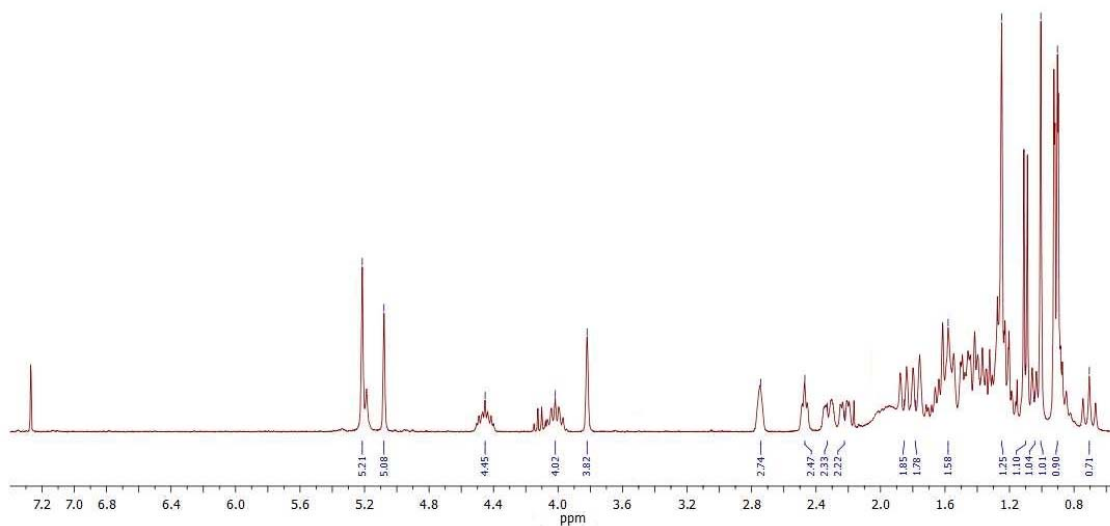

Figure S36.  $^1\text{H}$ -NMR spectrum of compound 15.

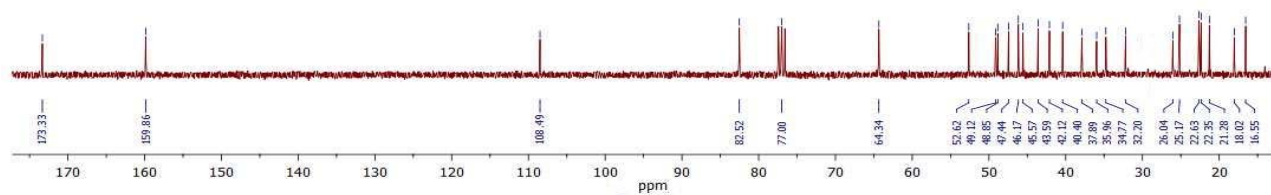

**Figure S37.** <sup>13</sup>C-NMR spectrum of compound 15.

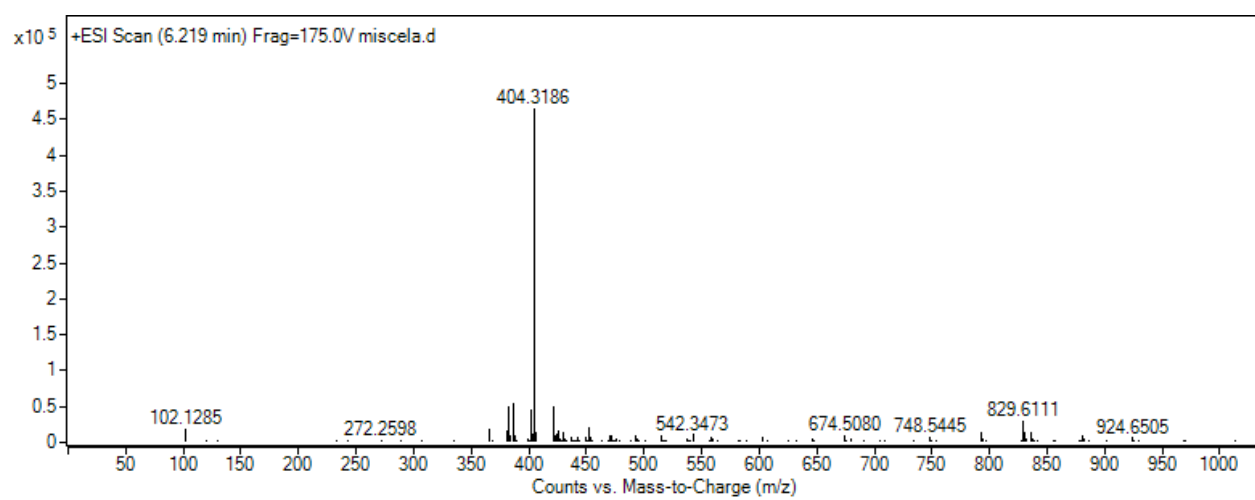

**Figure S38.** Mass spectrum of compound 15.

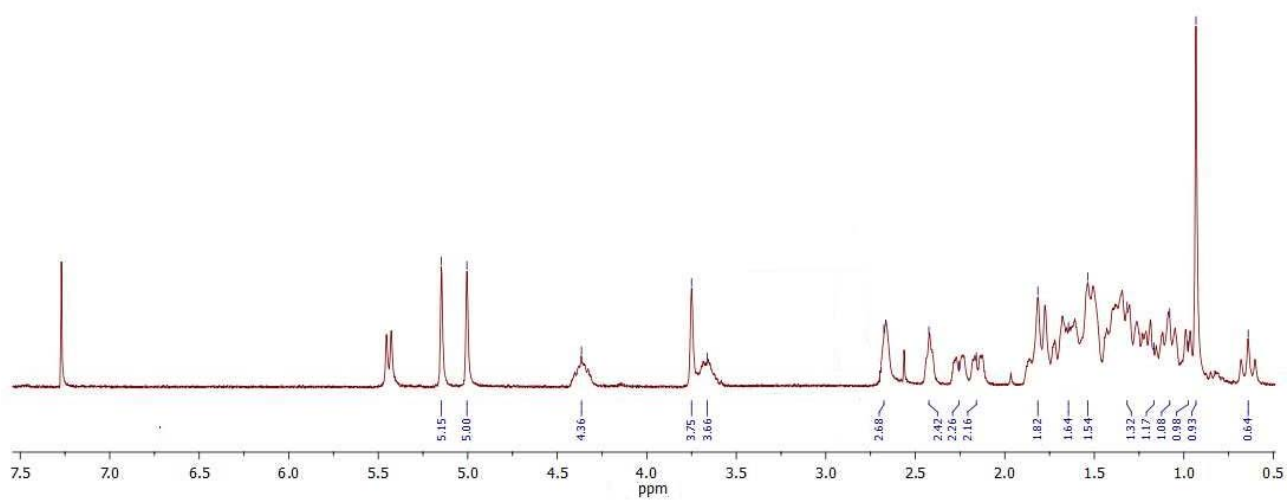

**Figure S39.**  $^1\text{H}$ -NMR spectrum of compound **16**.

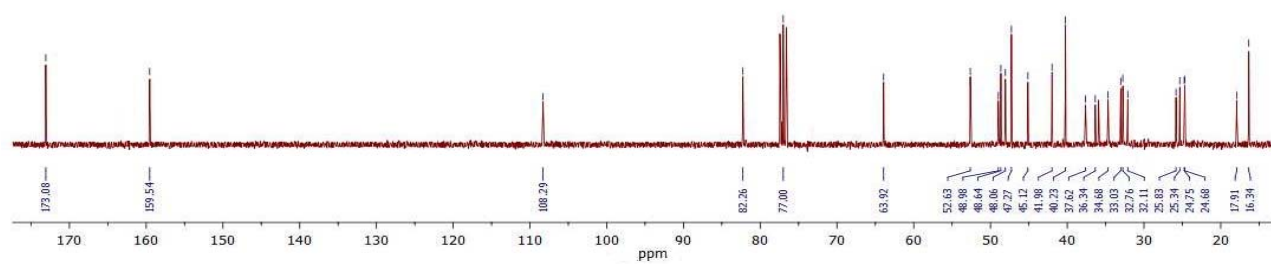

**Figure S40.**  $^{13}\text{C}$ -NMR spectrum of compound **16**.

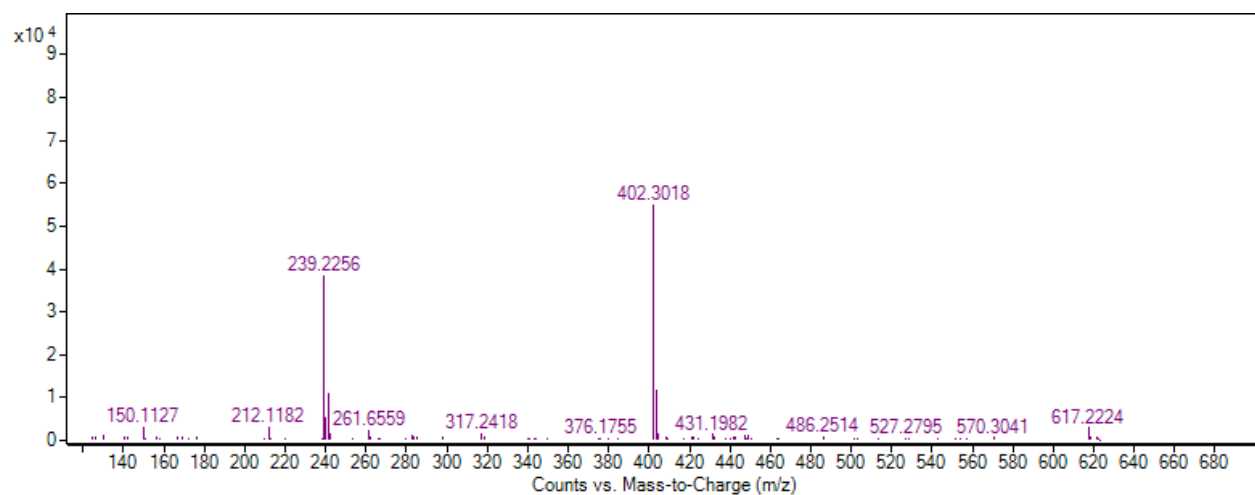

**Figure S41.** Mass spectrum of compound 16.

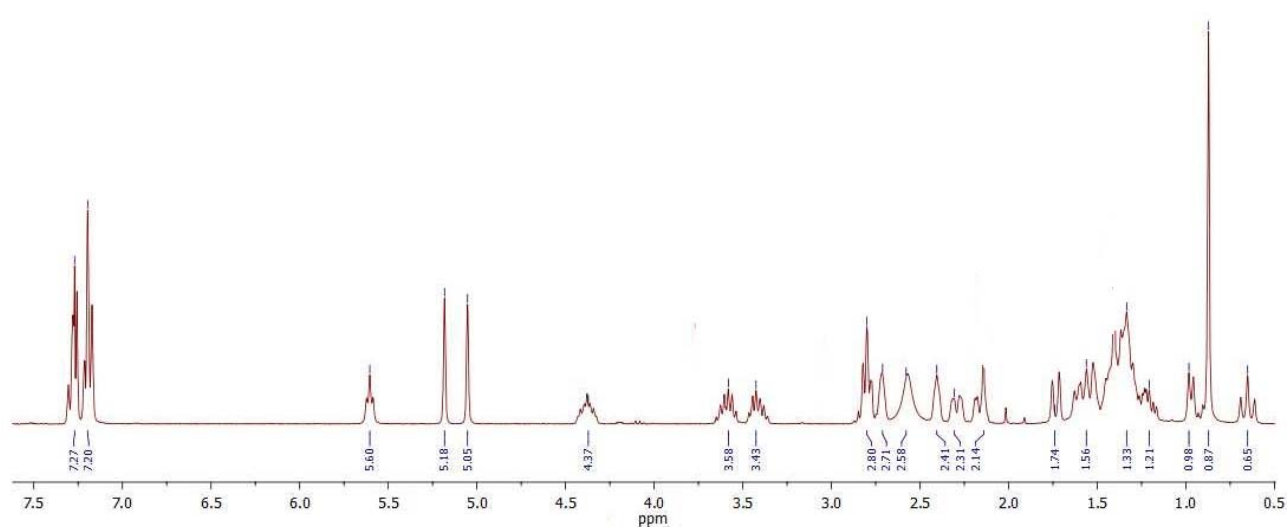

**Figure S42.**  $^1\text{H}$ -NMR spectrum of compound 17.

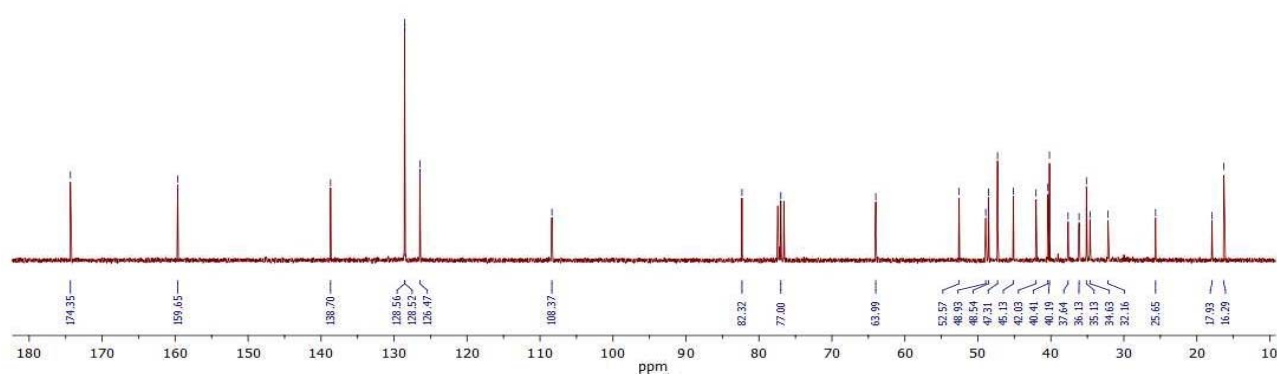

**Figure S43.**  $^{13}\text{C}$ -NMR spectrum of compound 17.

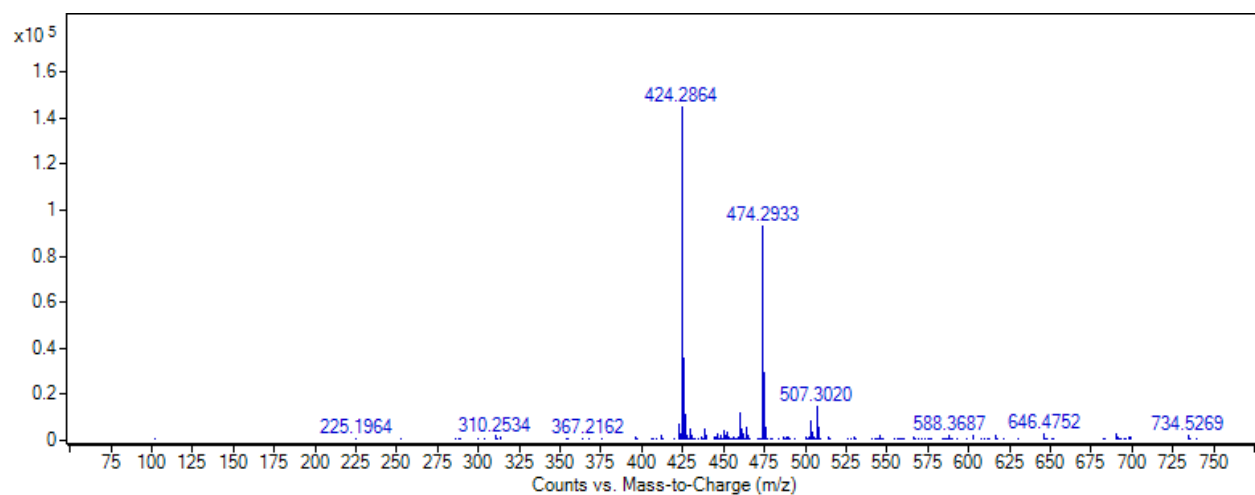

**Figure S44.** Mass spectrum of compound 17.

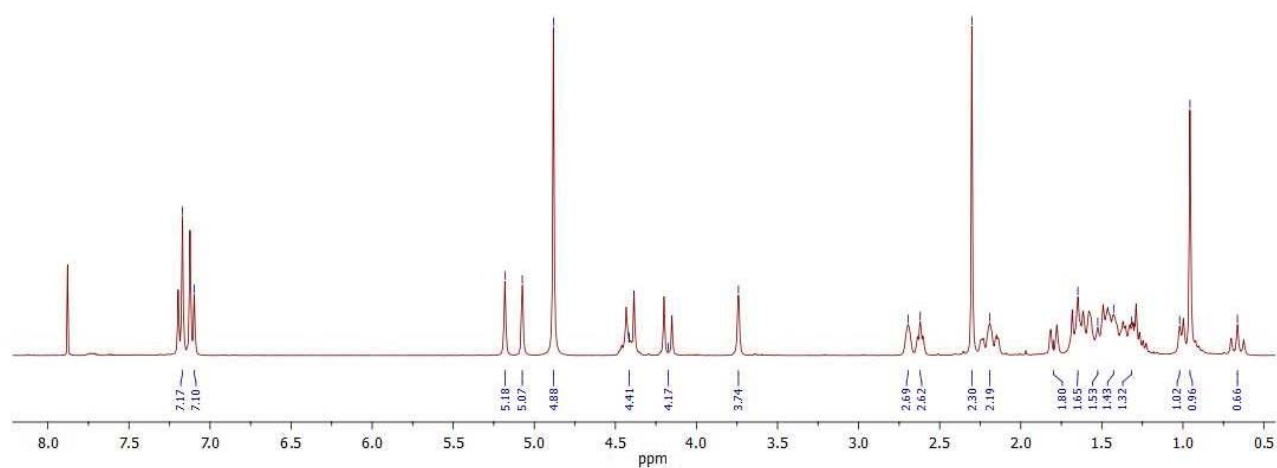

**Figure S45.**  $^1\text{H}$ -NMR spectrum of compound 18.

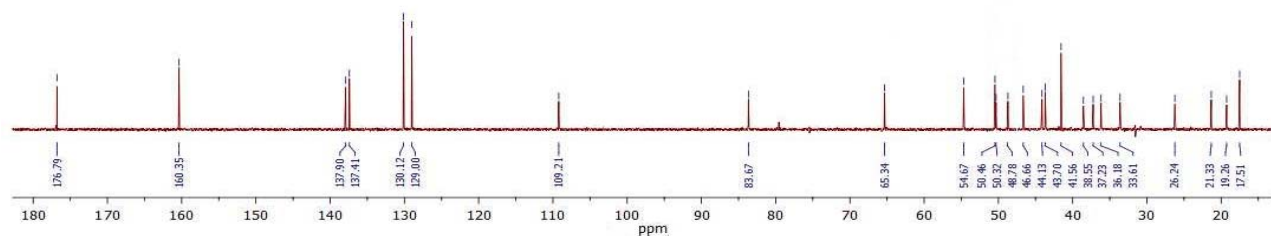

**Figure S46.** <sup>13</sup>C-NMR spectrum of compound 18.

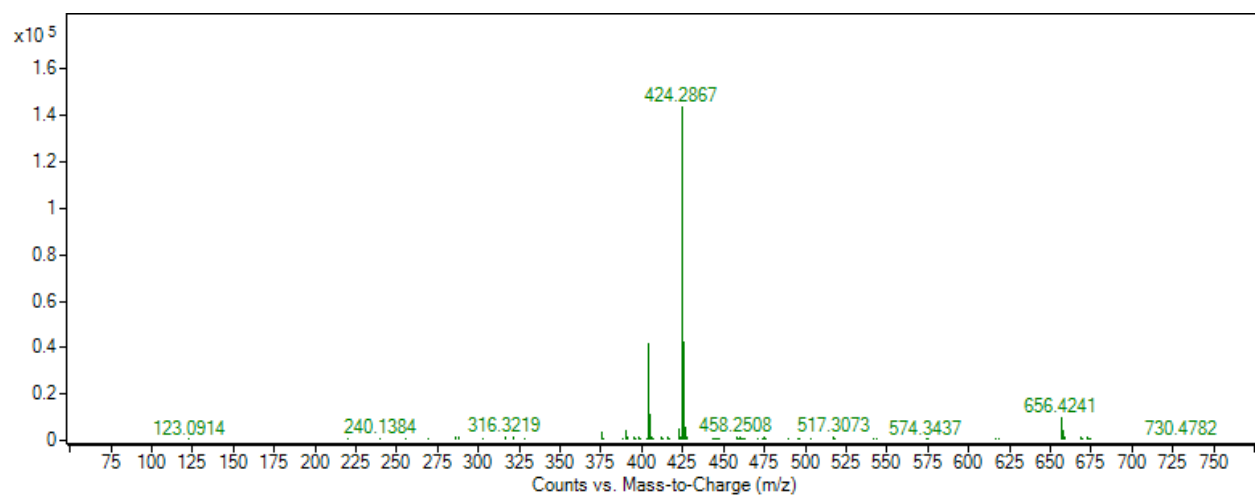

**Figure S47.** Mass spectrum of compound 18.

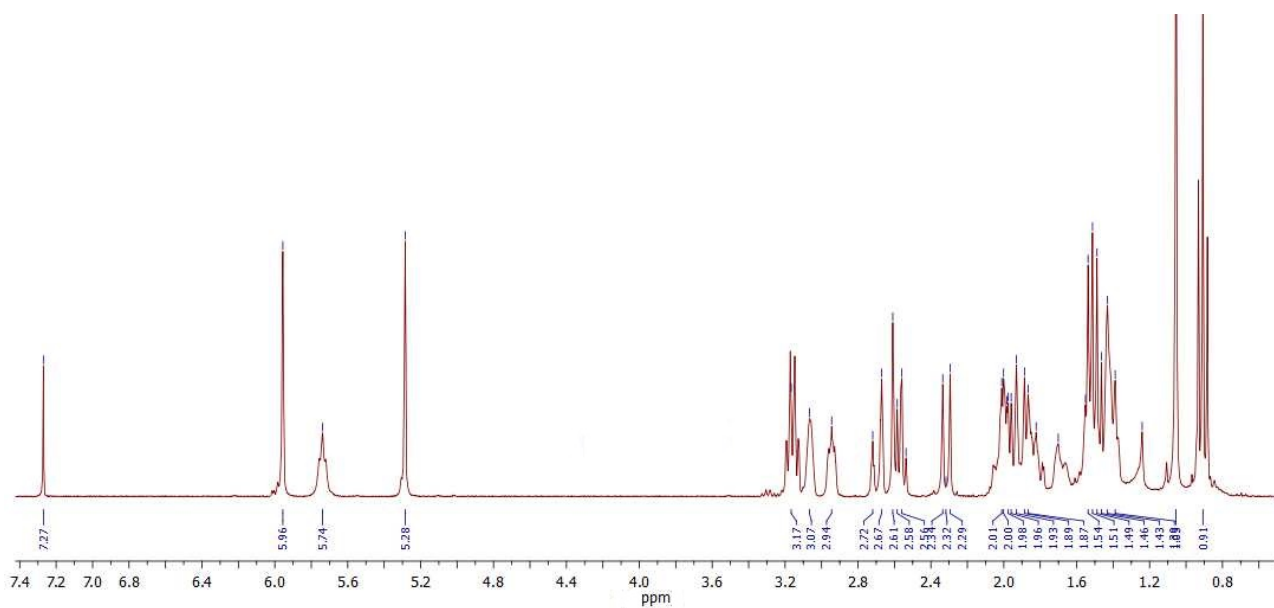

**Figure S48.** <sup>1</sup>H-NMR spectrum of compound 19.

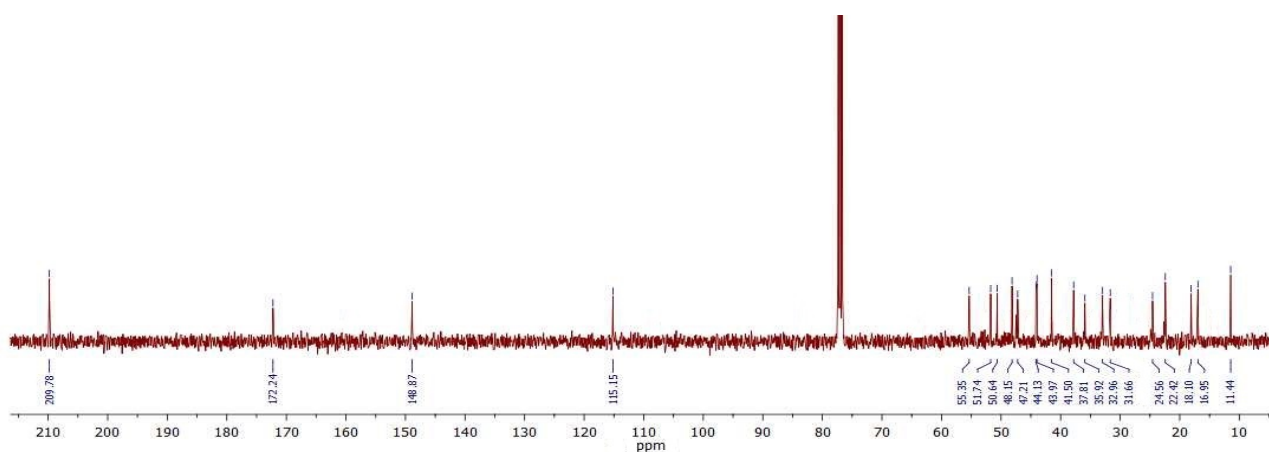

**Figure S49.**  $^{13}\text{C}$ -NMR spectrum of compound 19.

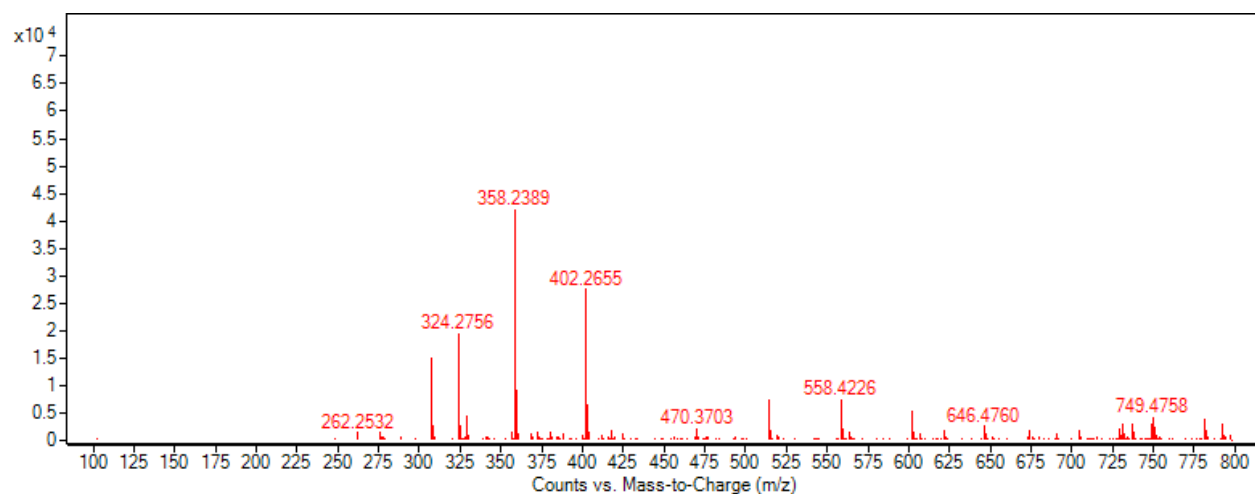

**Figure S50.** Mass spectrum of compound 19.

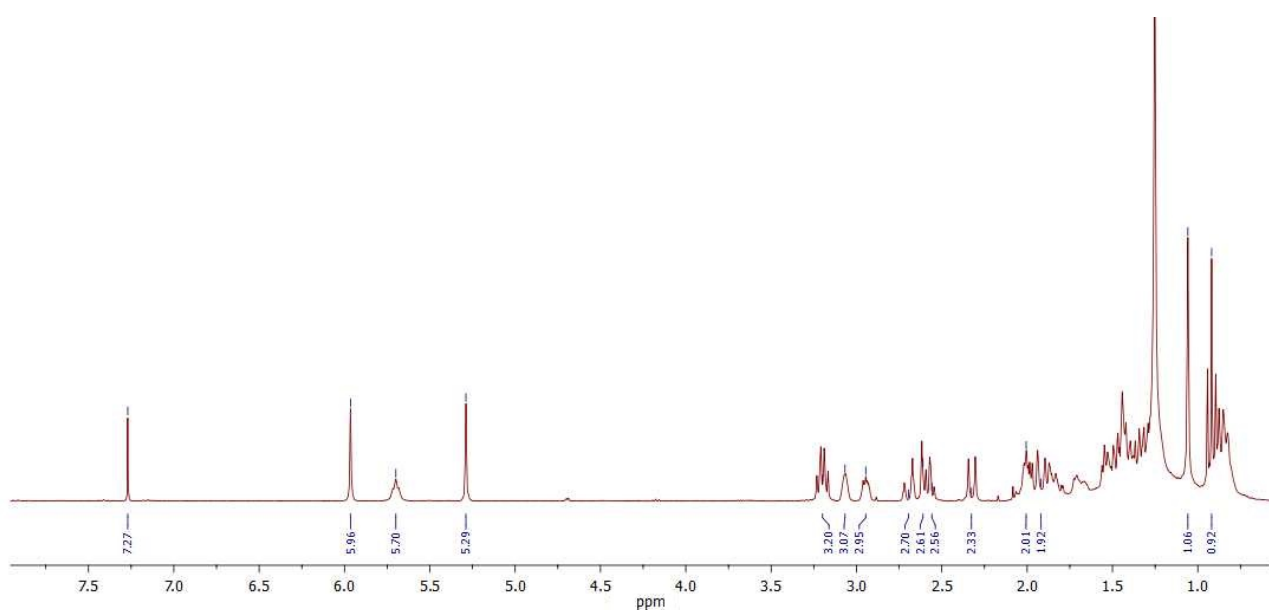

**Figure S51.**  $^1\text{H}$ -NMR spectrum of compound 20.



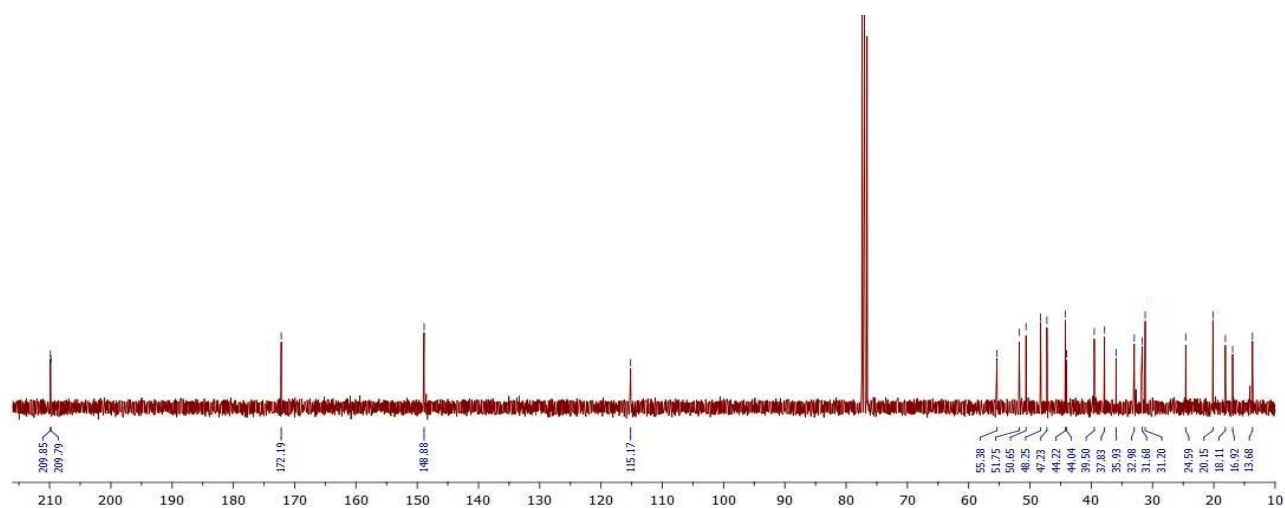

**Figure S52.**  $^{13}\text{C}$ -NMR spectrum of compound 20.

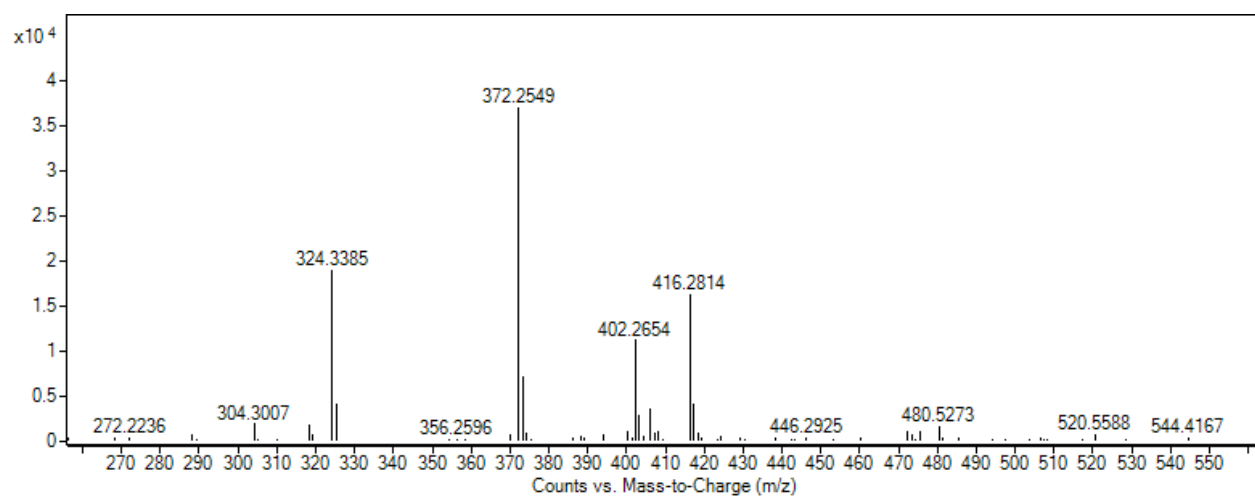

**Figure S53.** Mass spectrum of compound 20.

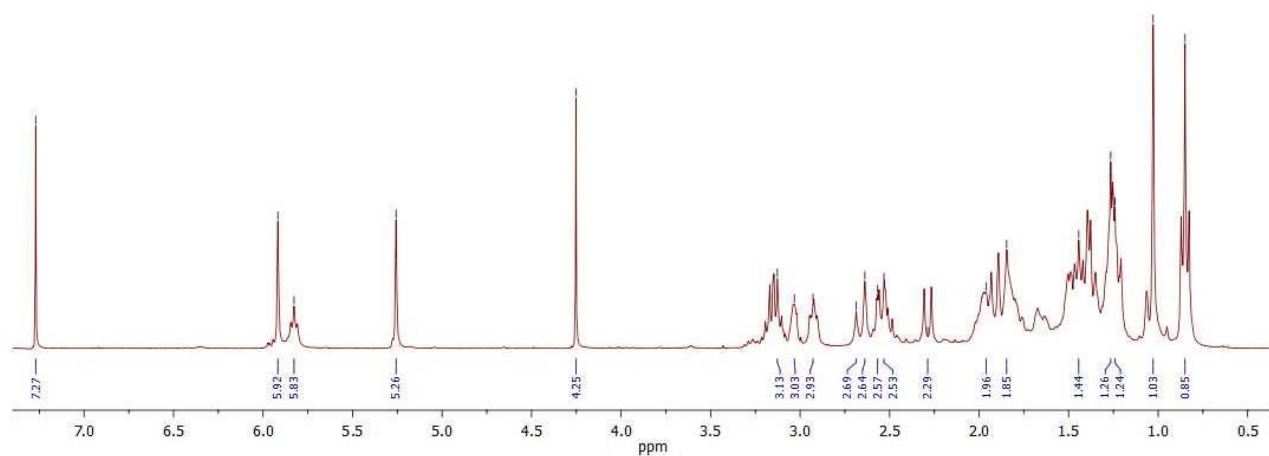

**Figure S54.**  $^1\text{H}$ -NMR spectrum of compound 21.

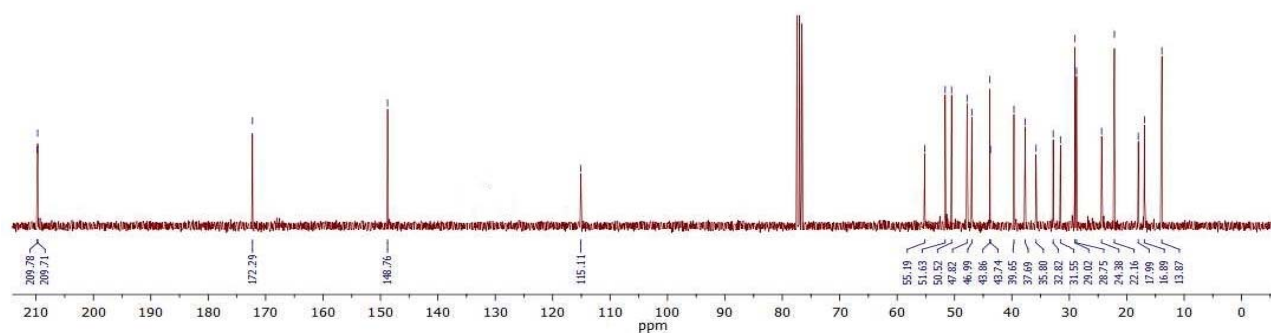

**Figure S55.**  $^{13}\text{C}$ -NMR spectrum of compound **21**.

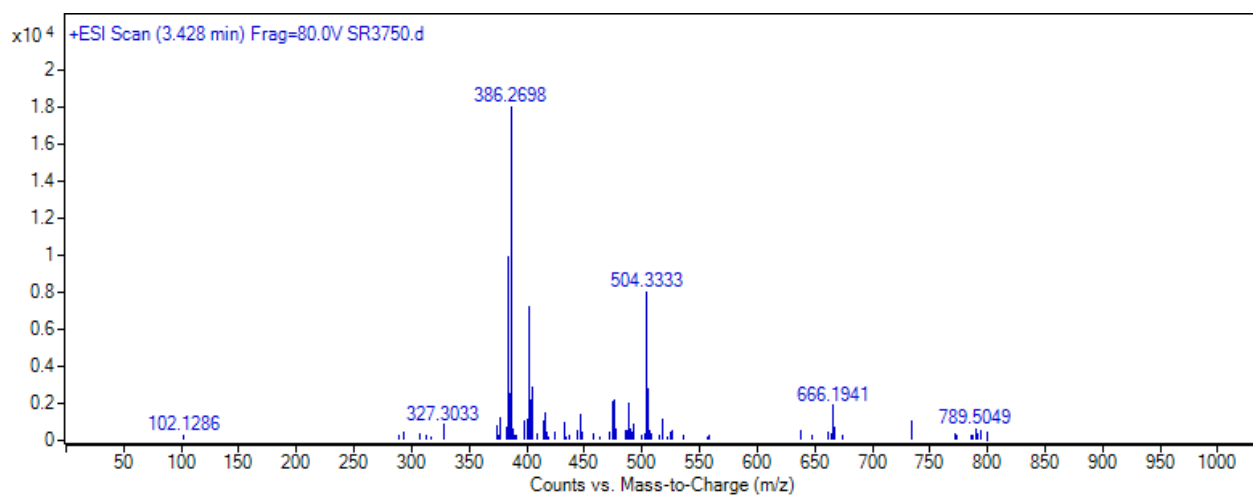

**Figure S56.** Mass spectrum of compound **21**.

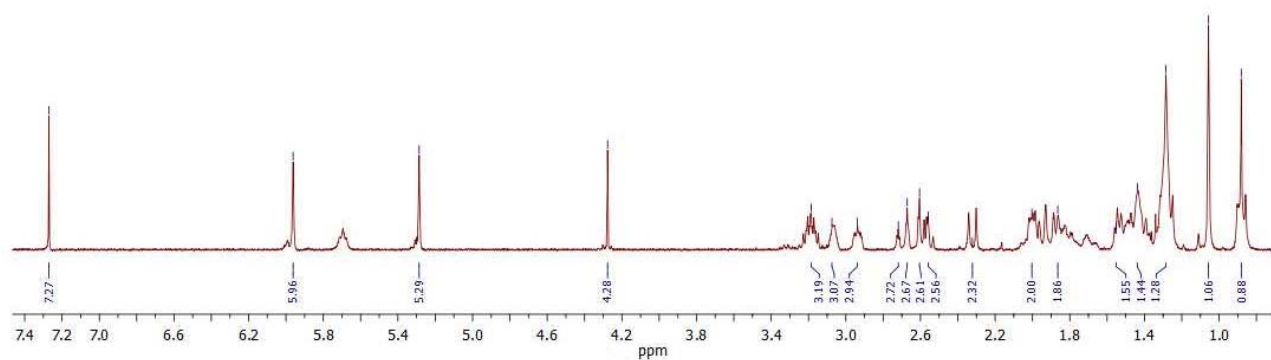

**Figure S57.**  $^1\text{H}$ -NMR spectrum of compound **22**.

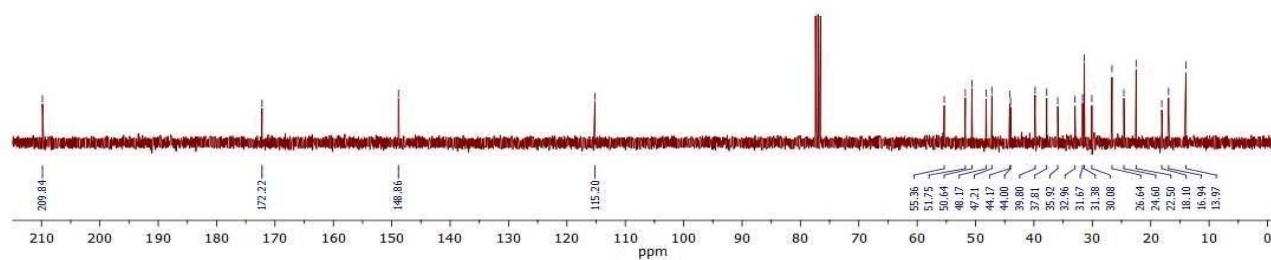

**Figure S58.**  $^{13}\text{C}$ -NMR spectrum of compound 22.

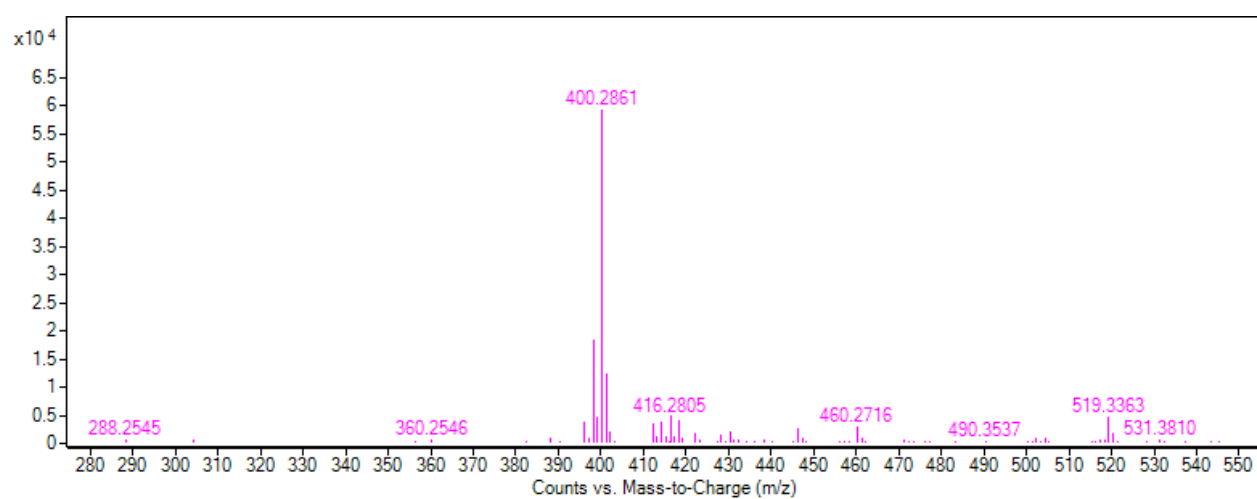

**Figure S59.** Mass spectrum of compound 22.

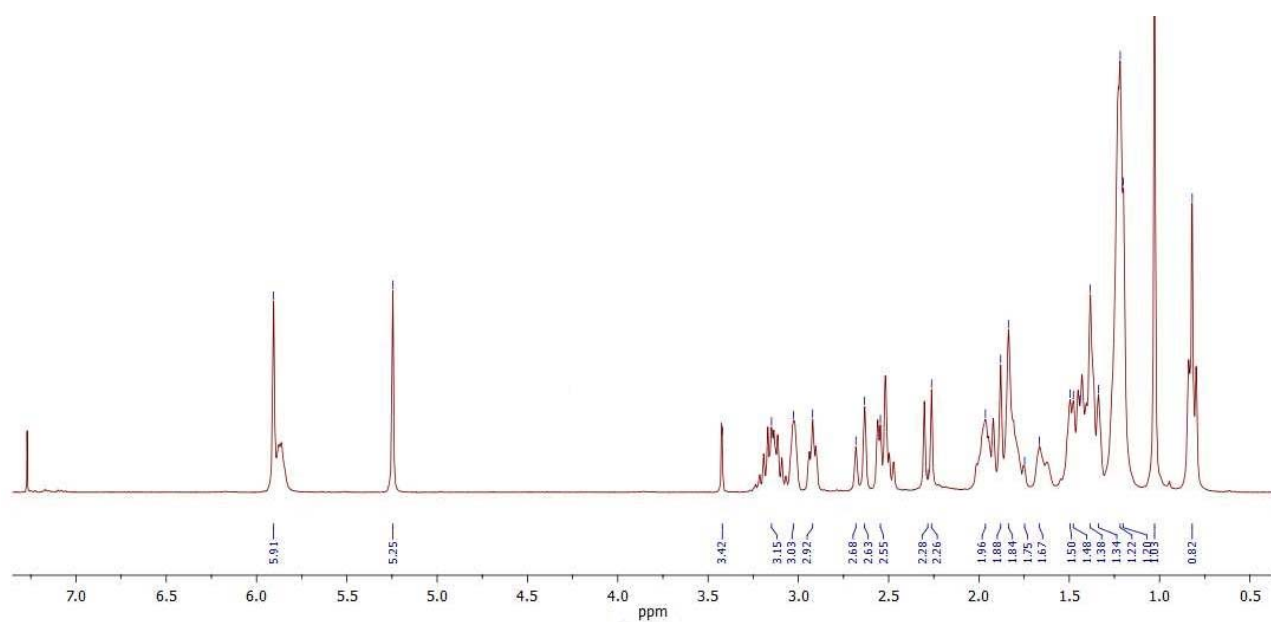

**Figure S60.**  $^1\text{H}$ -NMR spectrum of compound 23.

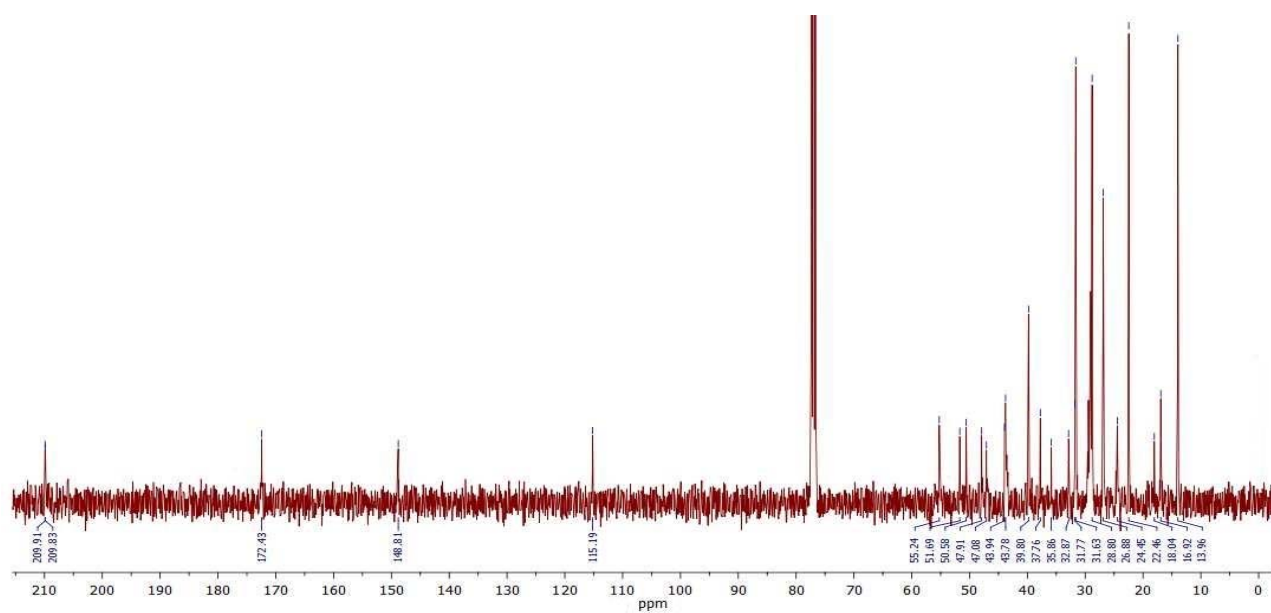

Figure S61. <sup>13</sup>C-NMR spectrum of compound 23.

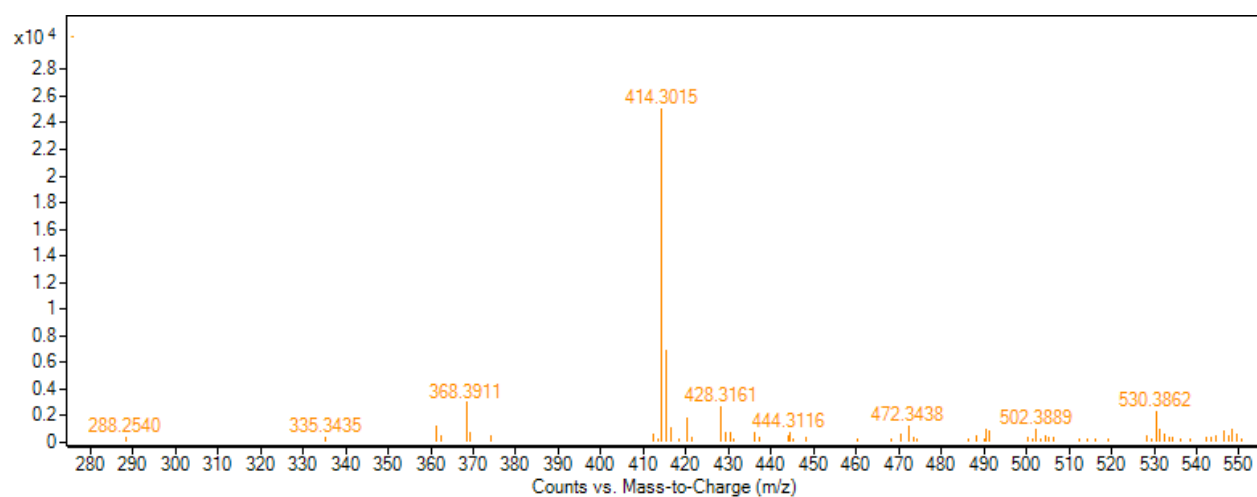

Figure S62. Mass spectrum of compound 23.

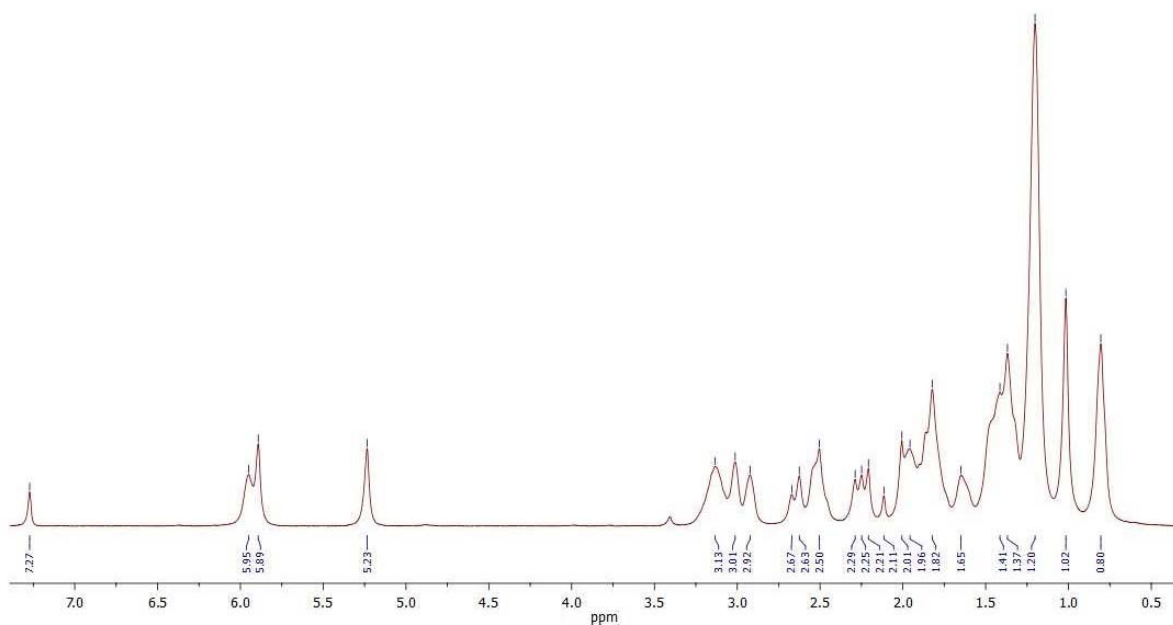

**Figure S63.**  $^1\text{H}$ -NMR spectrum of compound **24**.

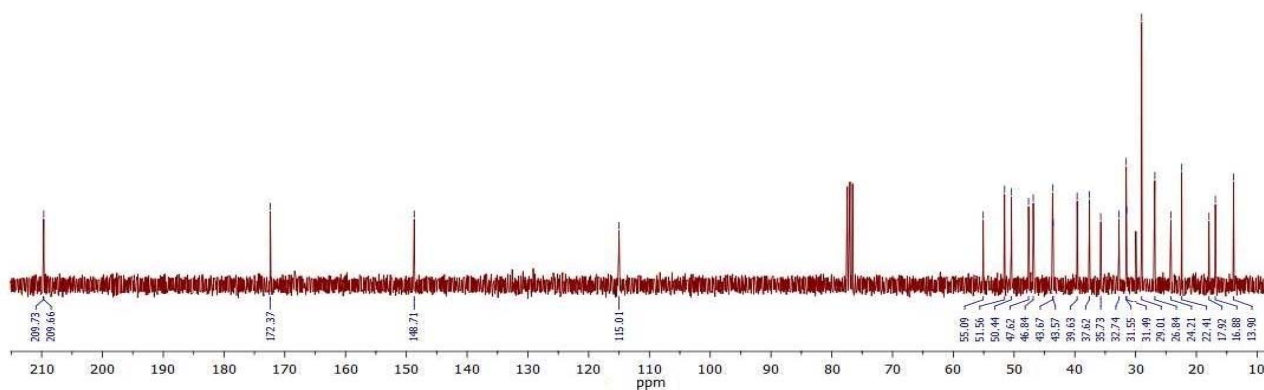

**Figure S64.**  $^{13}\text{C}$ -NMR spectrum of compound **24**.

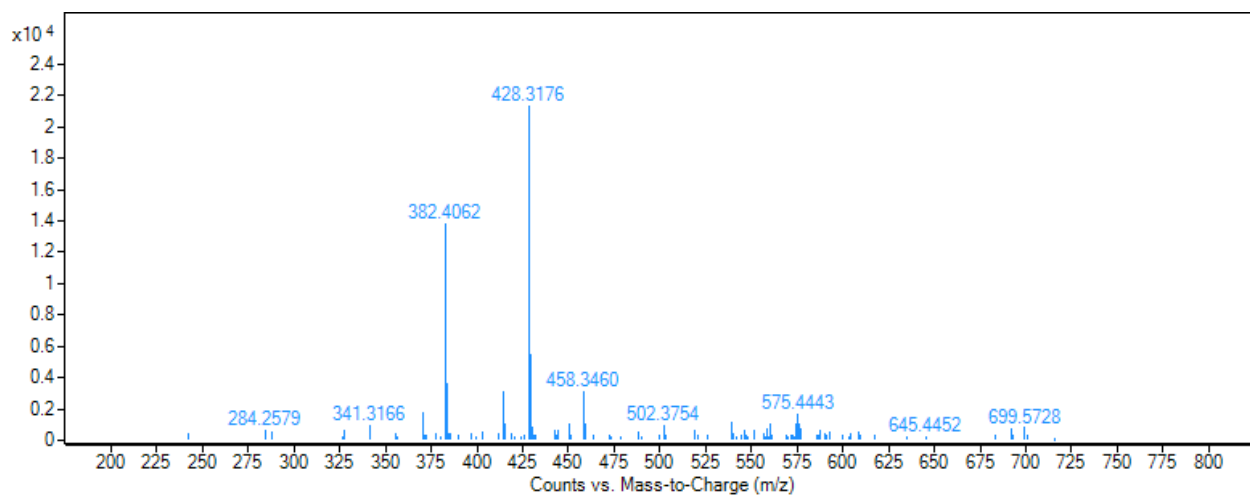

**Figure S65.** Mass spectrum of compound **24**.

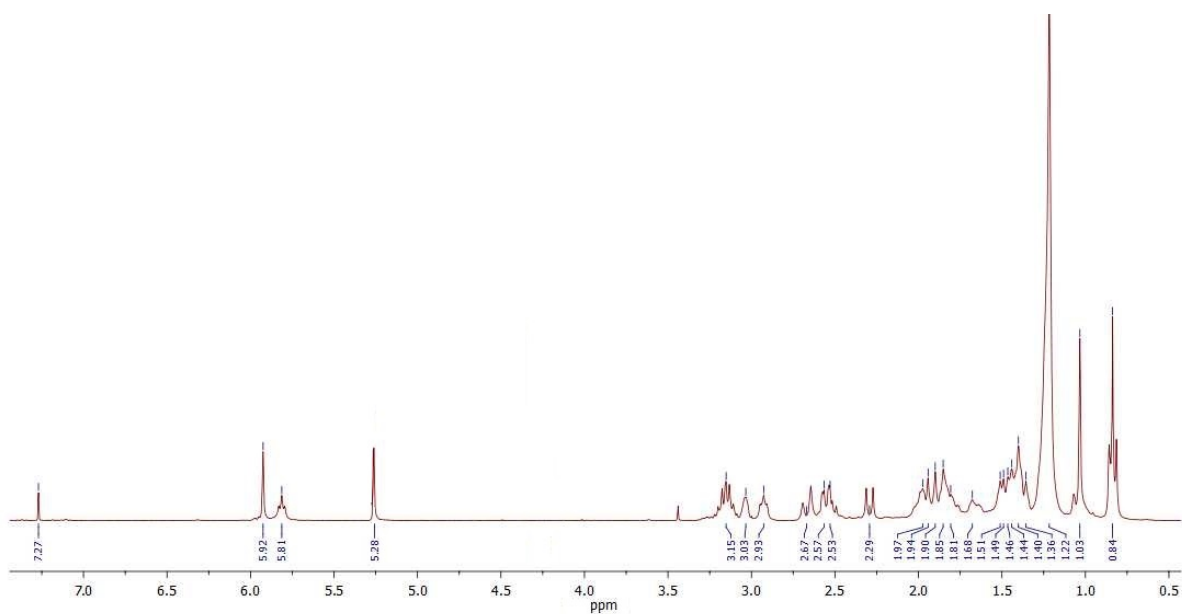

Figure S66.  $^1\text{H}$ -NMR spectrum of compound 25.

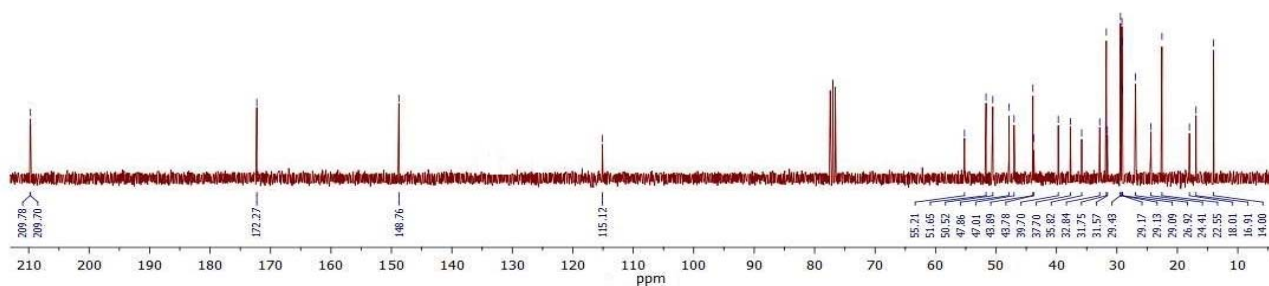

Figure S67.  $^{13}\text{C}$ -NMR spectrum of compound 25.

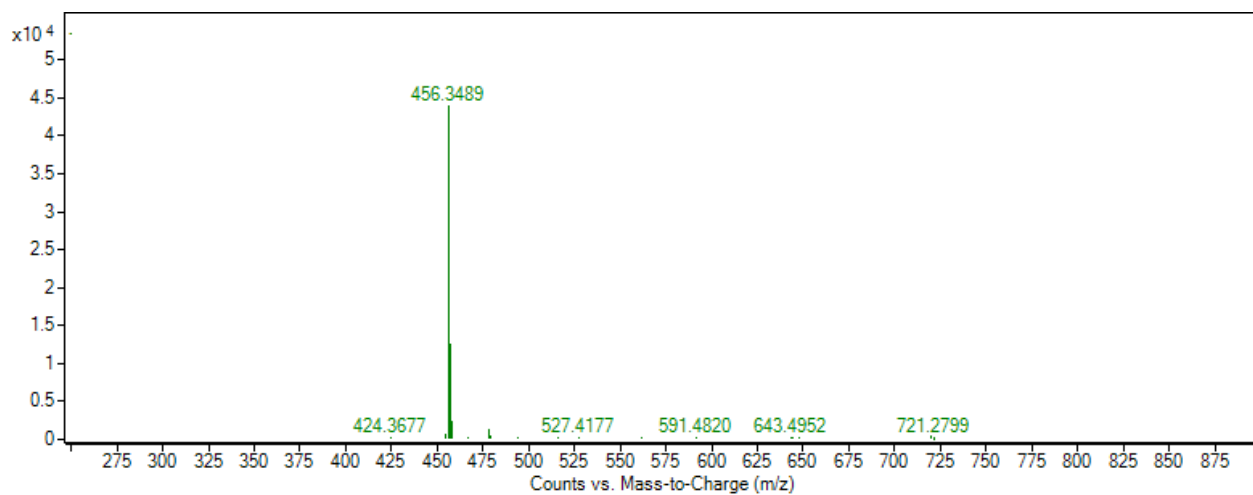

Figure S68. Mass spectrum of compound 25.

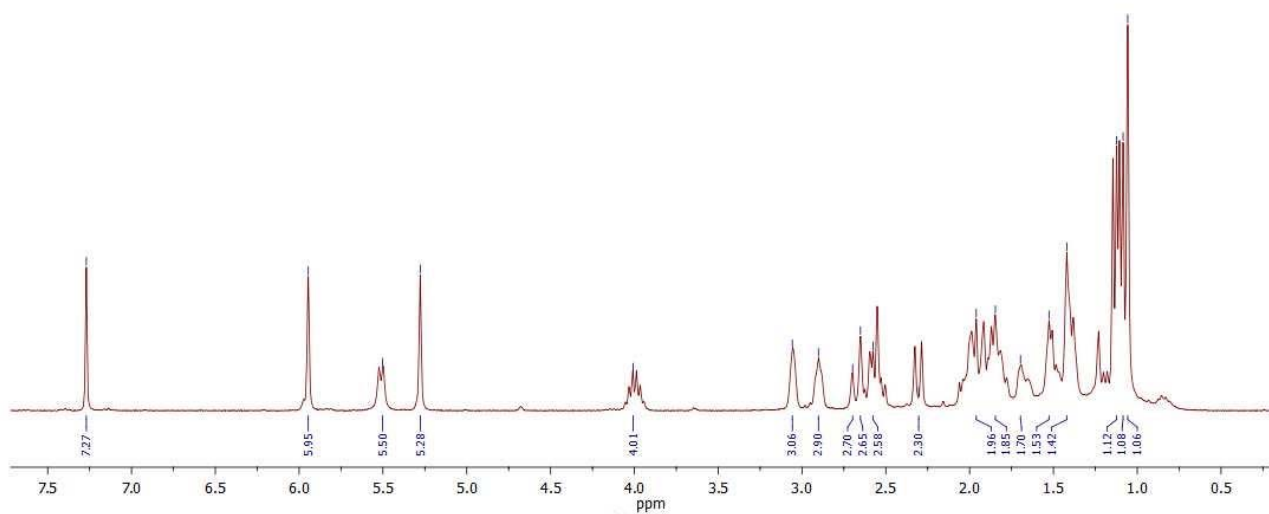

**Figure S69.**  $^1\text{H}$ -NMR spectrum of compound **26**.

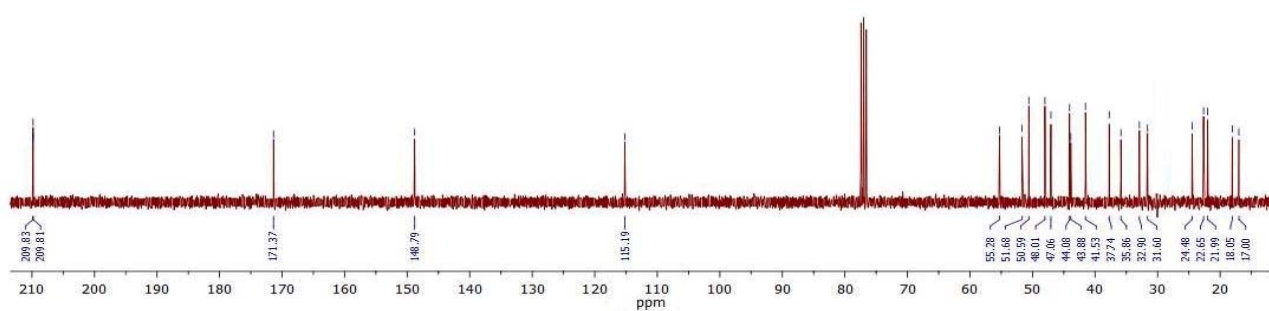

**Figure S70.**  $^{13}\text{C}$ -NMR spectrum of compound **26**.

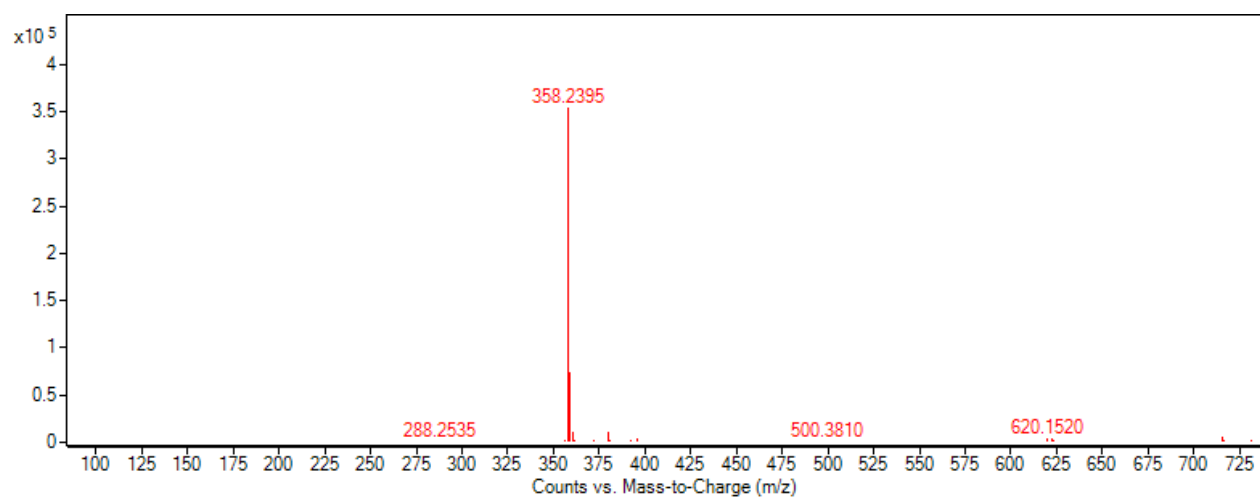

**Figure S71.** Mass spectrum of compound **26**.

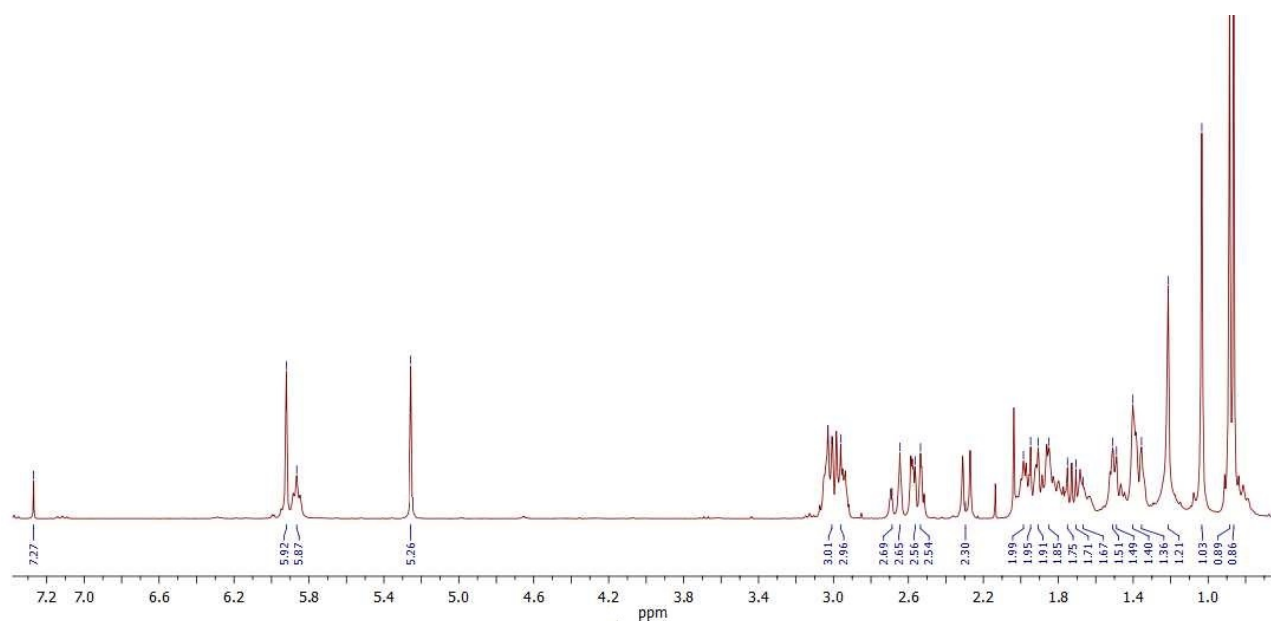

**Figure S72.**  $^1\text{H}$ -NMR spectrum of compound 27.

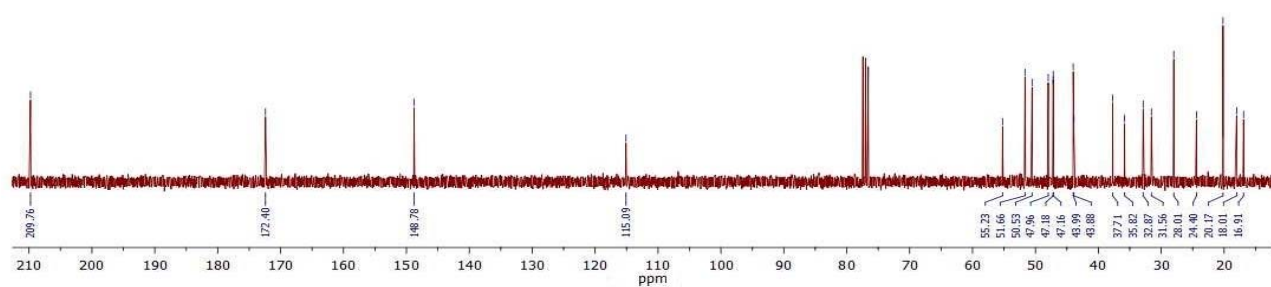

**Figure S73.**  $^{13}\text{C}$ -NMR spectrum of compound 27.

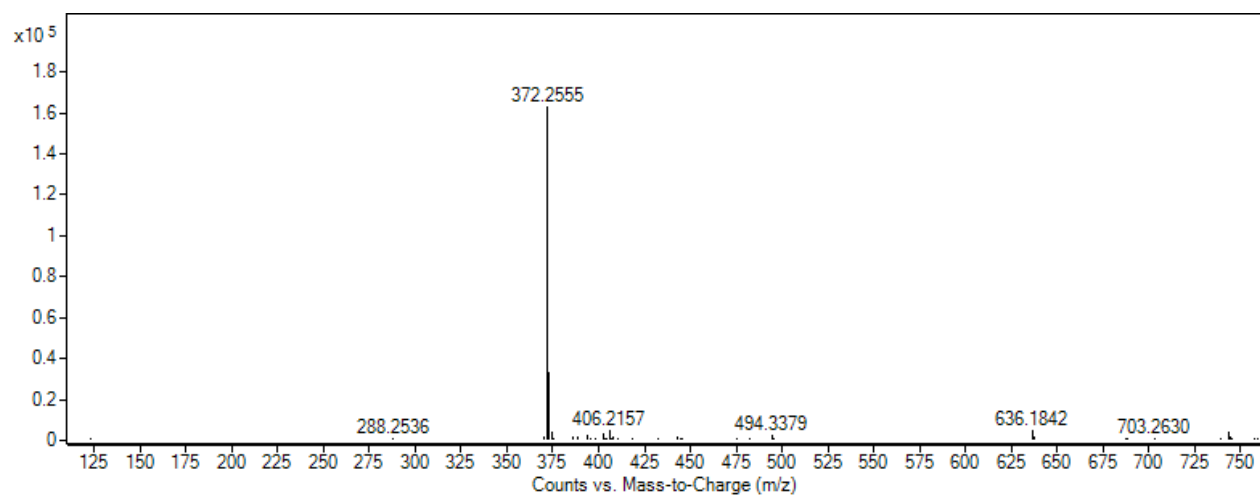

**Figure S74.** Mass spectrum of compound 27.



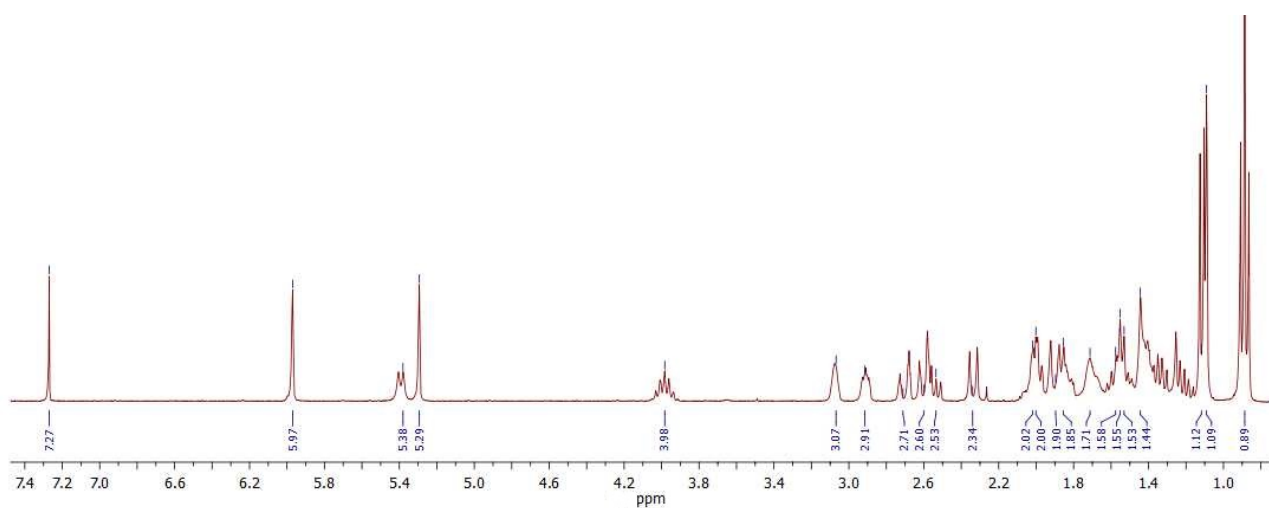

**Figure S75.**  $^1\text{H}$ -NMR spectrum of compound 28.

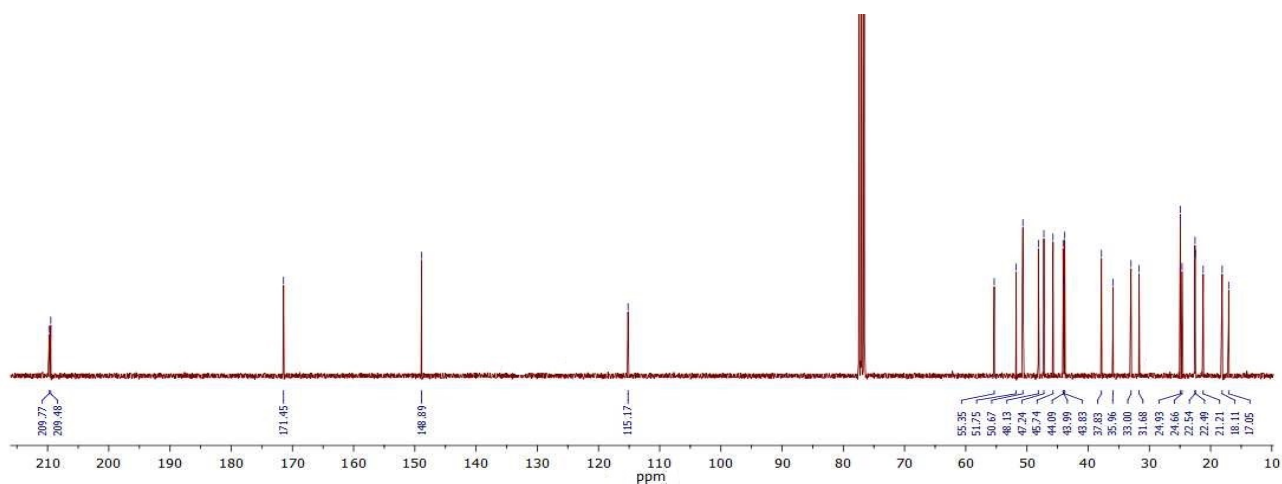

**Figure S76.**  $^{13}\text{C}$ -NMR spectrum of compound 28.

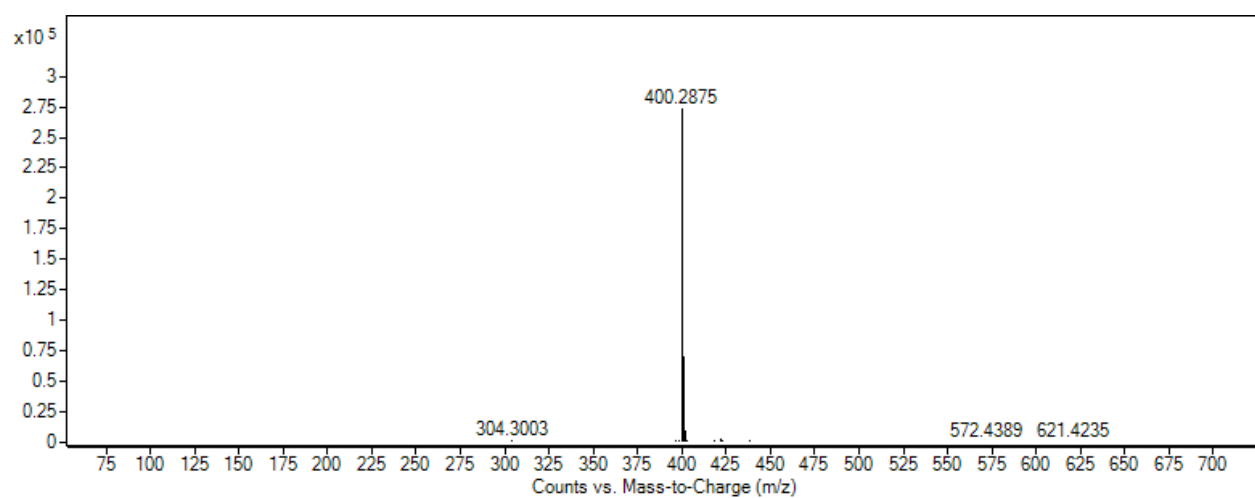

**Figure S77.** Mass spectrum of compound 28.

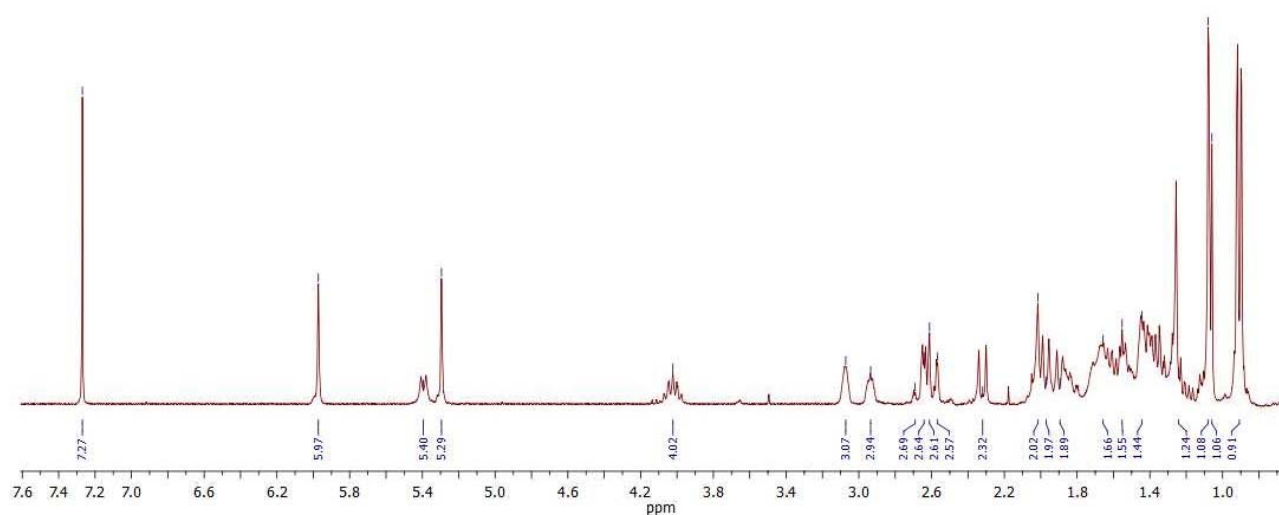

**Figure S78.**  $^1\text{H}$ -NMR spectrum of compound **29**.

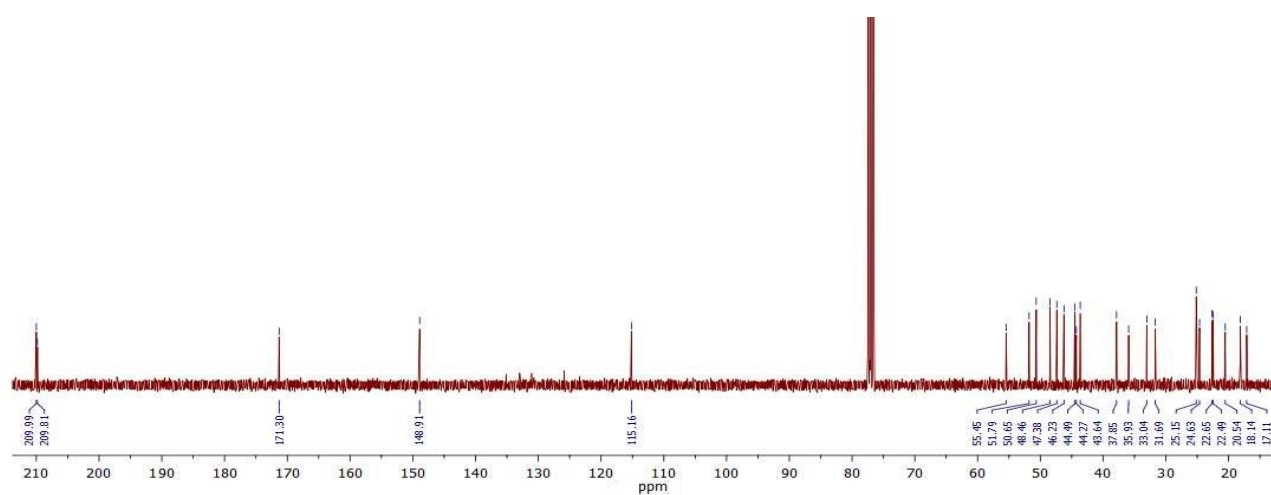

**Figure S79.**  $^{13}\text{C}$ -NMR spectrum of compound **29**.

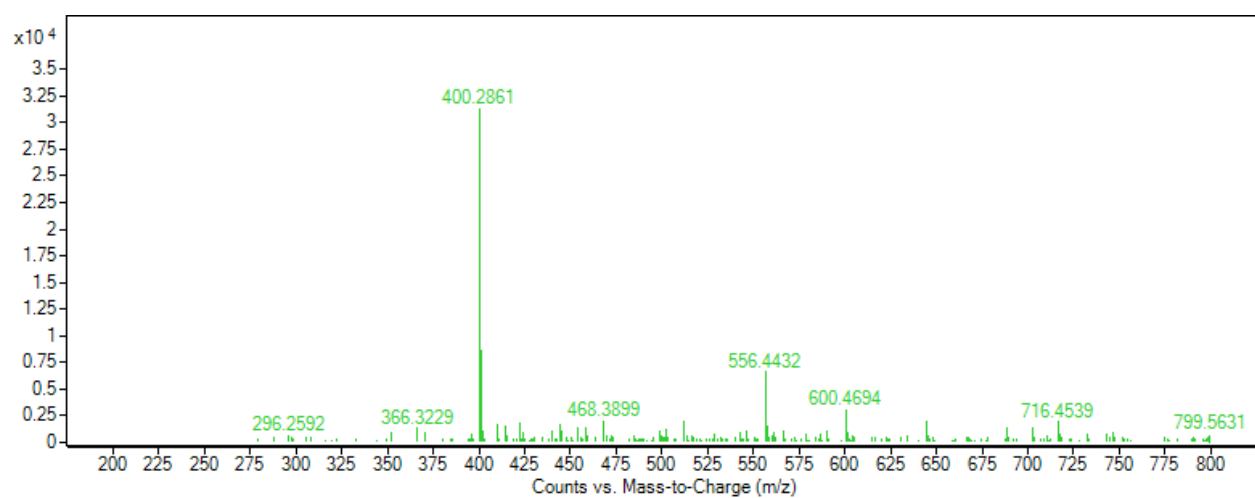

**Figure S80.** Mass spectrum of compound **29**.

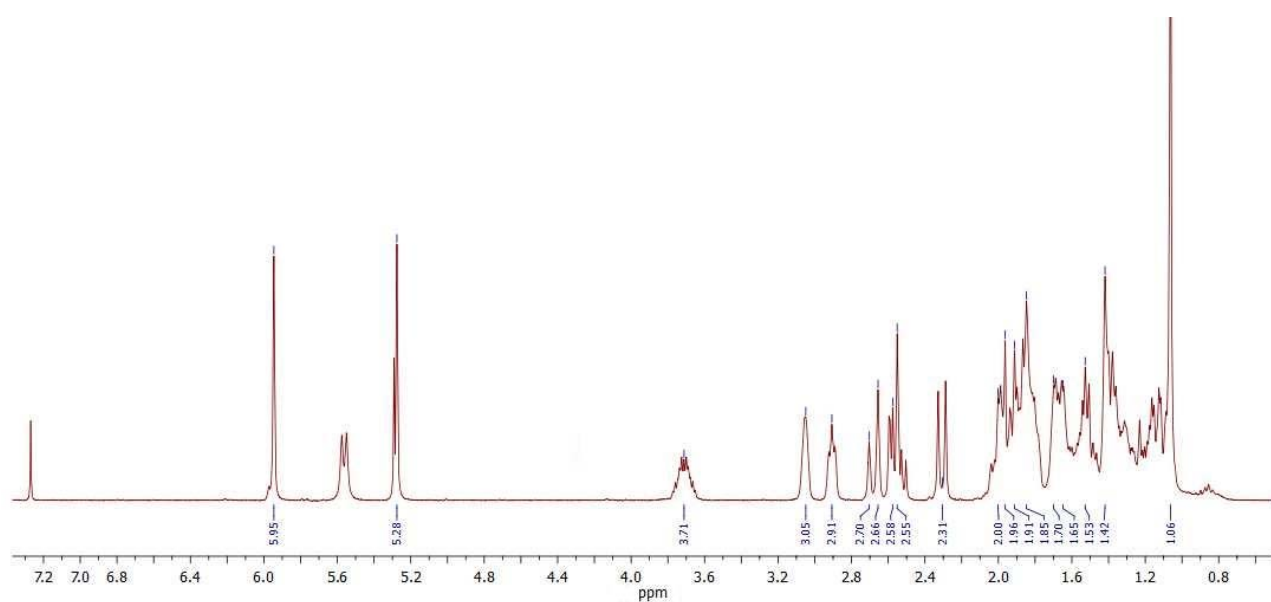

Figure S81.  $^1\text{H}$ -NMR spectrum of compound 30.

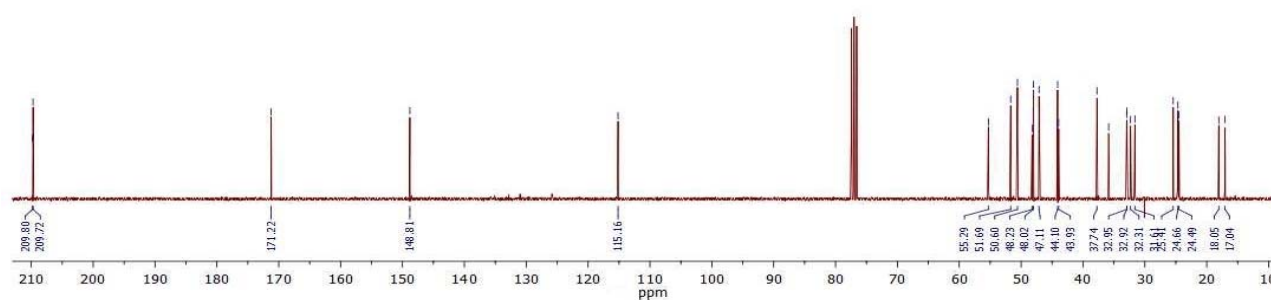

Figure S82.  $^{13}\text{C}$ -NMR spectrum of compound 30.

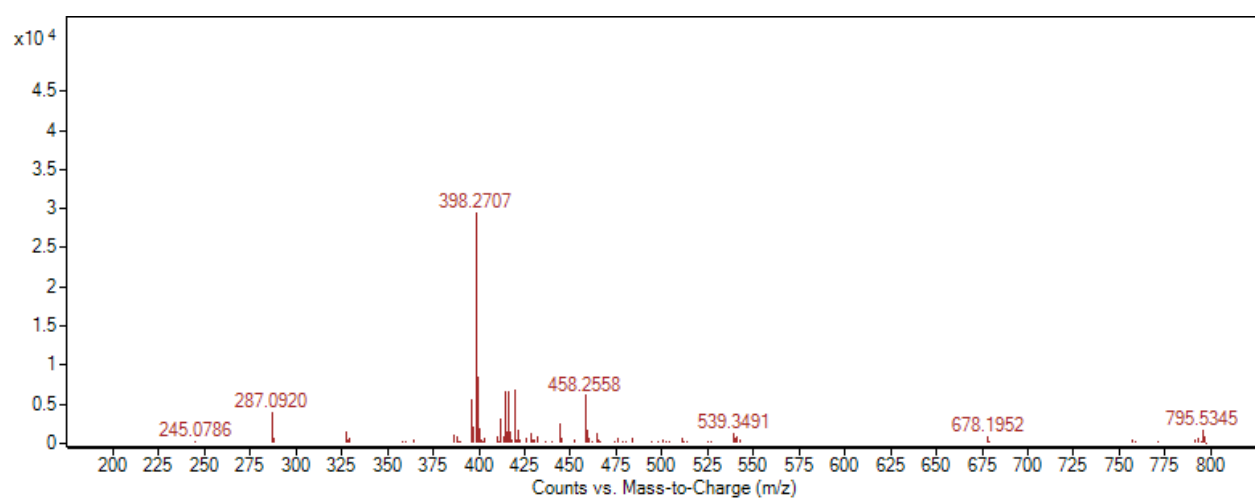

Figure S83. Mass spectrum of compound 30.

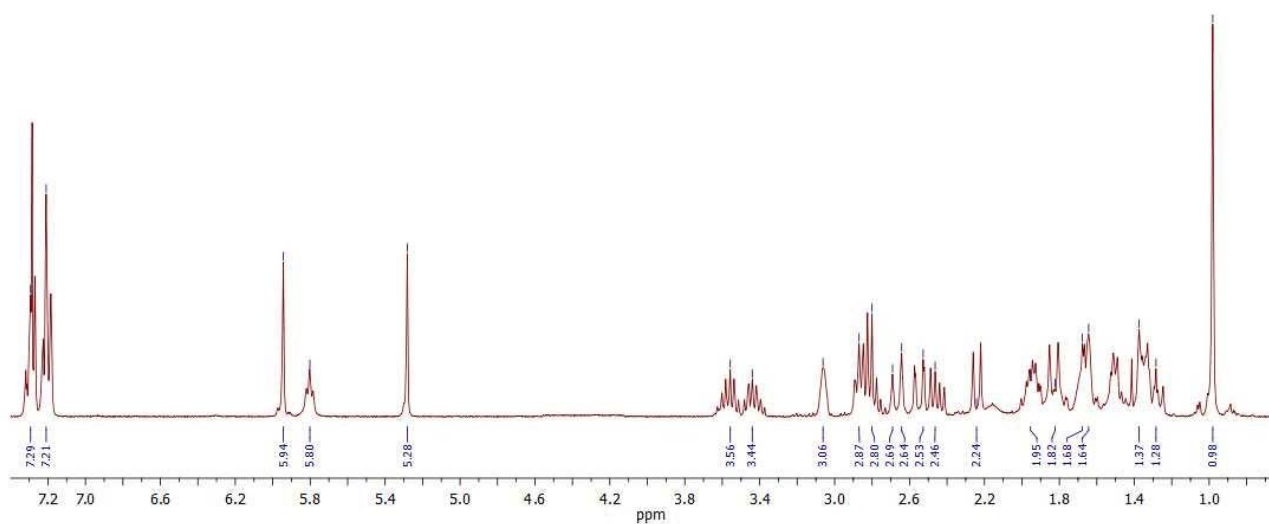

**Figure S84.**  $^1\text{H}$ -NMR spectrum of compound **31**.

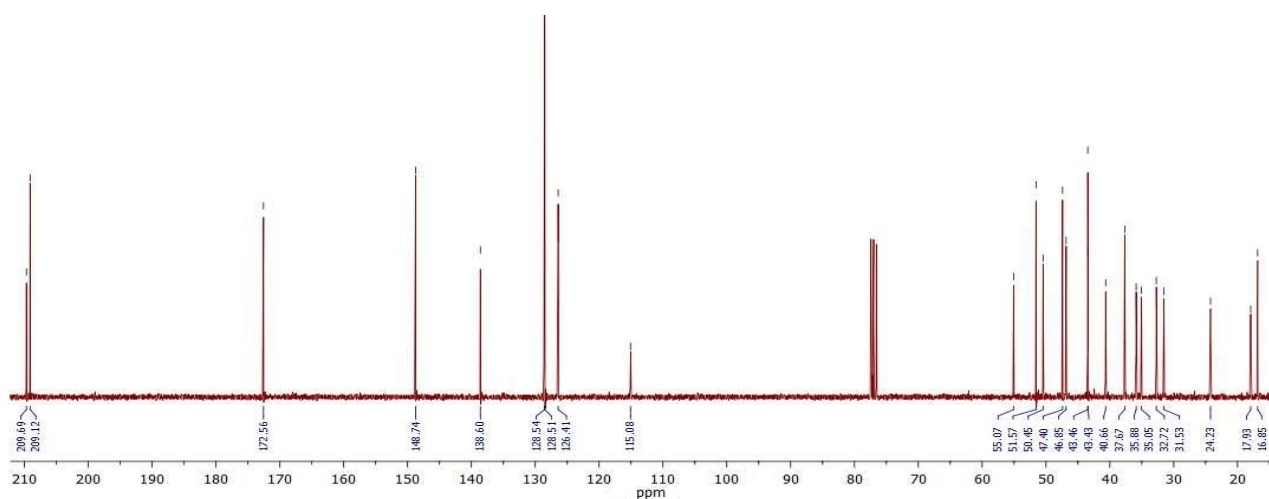

**Figure S85.**  $^{13}\text{C}$ -NMR spectrum of compound **31**.

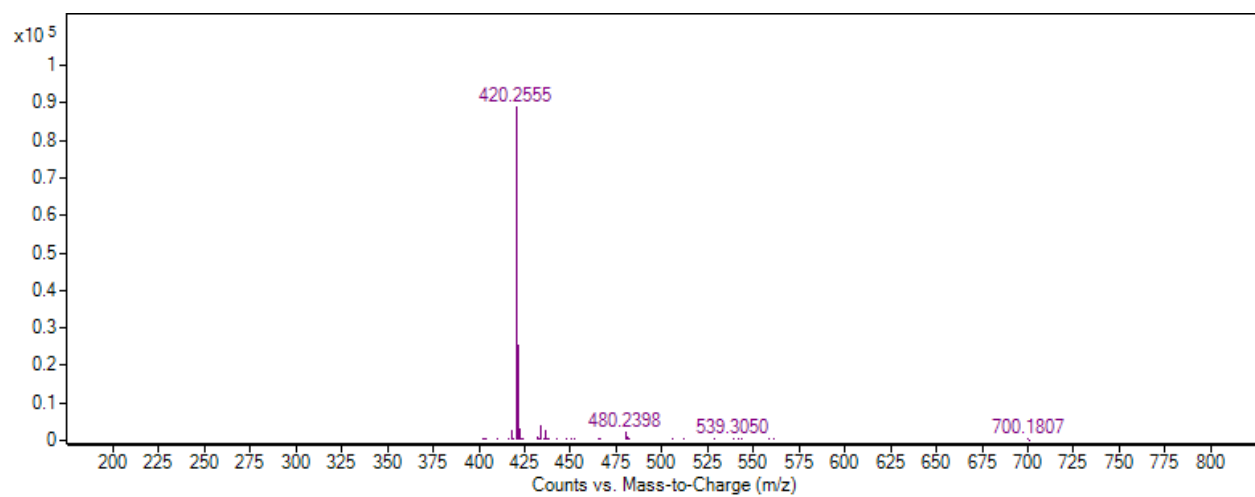

**Figure S86.** Mass spectrum of compound **31**.

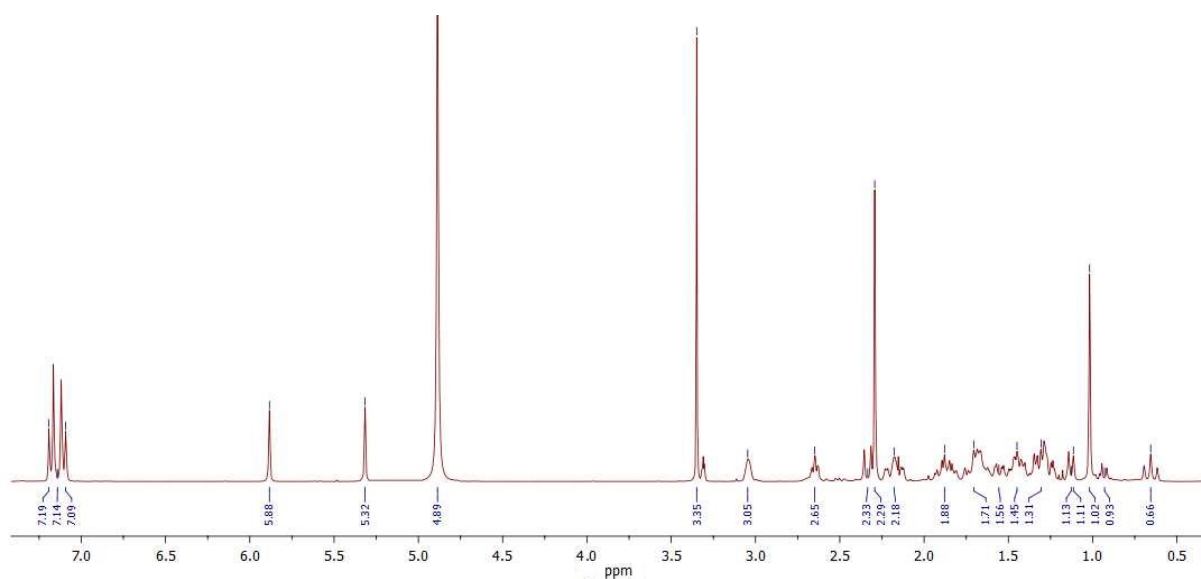

**Figure S87.**  $^1\text{H}$ -NMR spectrum of compound **32**.

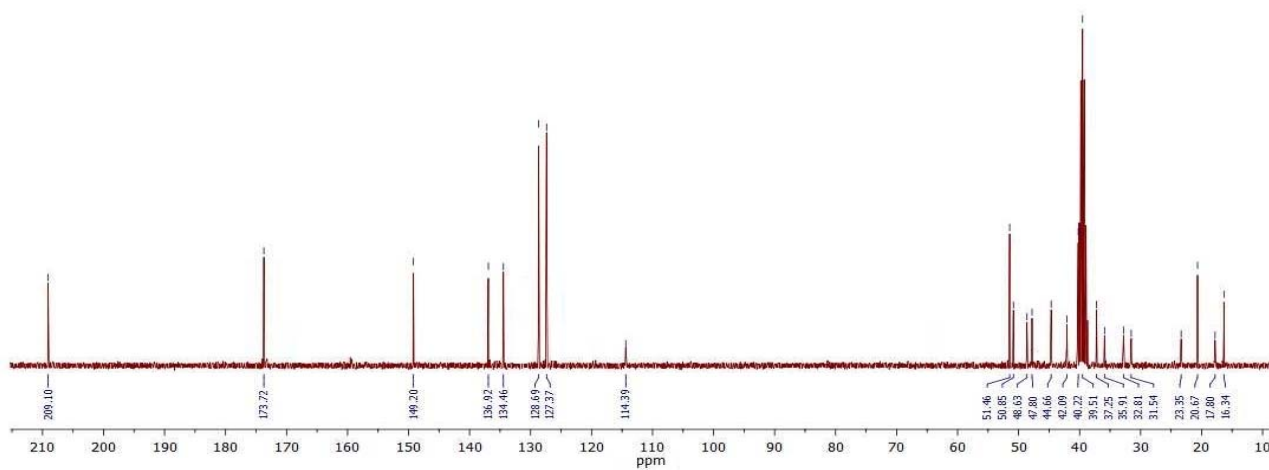

**Figure S88.**  $^{13}\text{C}$ -NMR spectrum of compound **32**.

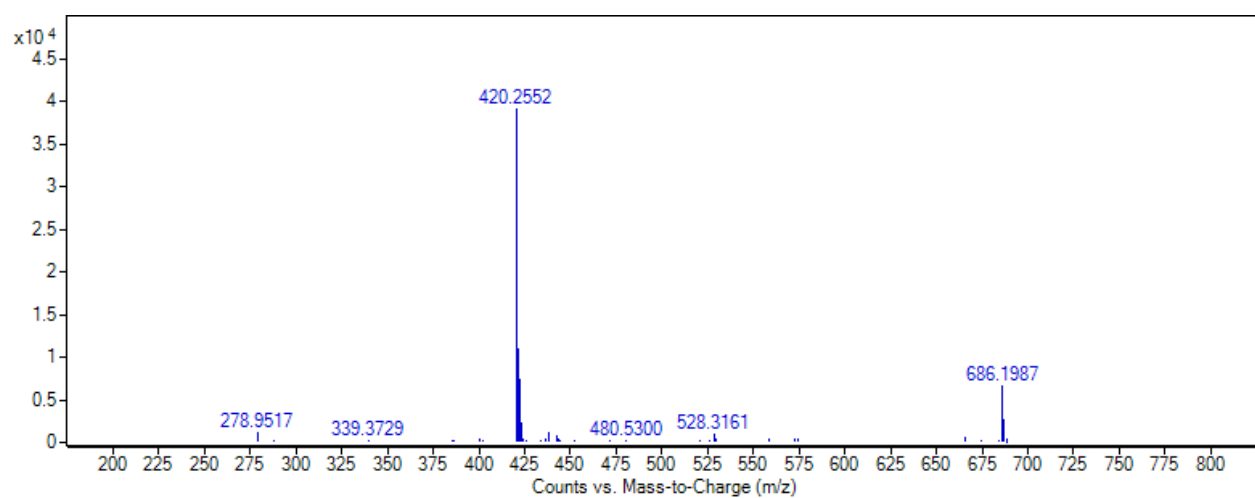

**Figure S89.** Mass spectrum of compound **32**.
